# Supplementary material for: Manganese(iii)-mediated alkenyl Csp2–P bond formation from the reaction of β-nitrostyrenes with dialkyl phosphites
Source: Royal Society of Chemistry journal article supplement (doi:10.1039/c5ob00404g), 2015-01-01

*Supporting Information for*

**Manganese(III)-mediated alkenyl C<sub>sp2</sub>-P bond formation from the reaction of  $\beta$ -nitrostyrenes with dialkyl phosphites**

**Jian-Fei Xue,<sup>a</sup> Shao-Fang Zhou,<sup>a</sup> Ye-Ye Liu,<sup>a</sup> Xiangqiang Pan,<sup>\*a</sup> Jian-Ping Zou<sup>\*a,b</sup> and**

**Olayinka Taiwo Asekun<sup>c</sup>**

<sup>a</sup> *Key Laboratory of Organic Synthesis of Jiangsu Province, College of Chemistry and Chemical Engineering, Soochow University, 199 Renai Street, Suzhou, Jiangsu 215123, China; E-mail: [jpzou@suda.edu.cn](mailto:jpzou@suda.edu.cn), [panxq@suda.edu.cn](mailto:panxq@suda.edu.cn)*

<sup>b</sup> *Key Laboratory of Synthetic Chemistry of Natural Substances, Shanghai Institute of Organic Chemistry, Chinese Academy of Sciences, Shanghai 200032, China.*

<sup>c</sup> *Department of Chemistry, University of Lagos, Akoka, Yaba, Nigeria.*

**Table of contents**

S-2 <sup>1</sup>H, <sup>13</sup>C NMR spectra of 3a-3u, and <sup>31</sup>P NMR spectra of compounds 3a, 3f-3o, 3q-3u

### NMR Spectra

**3a**

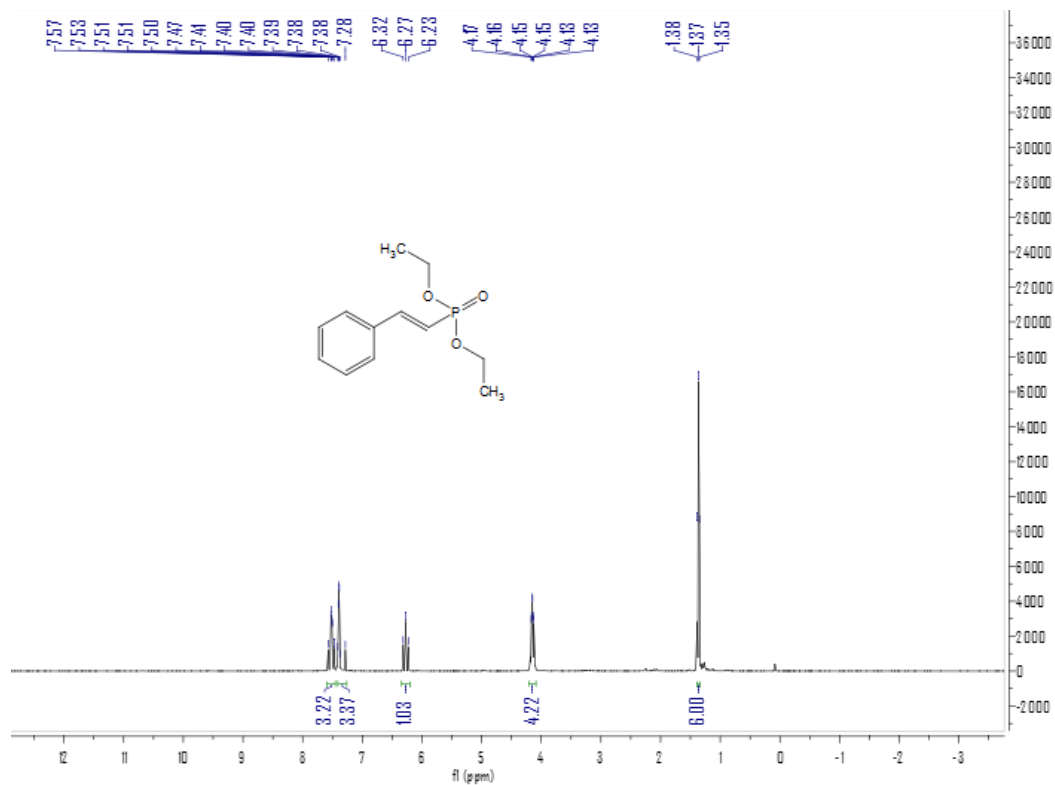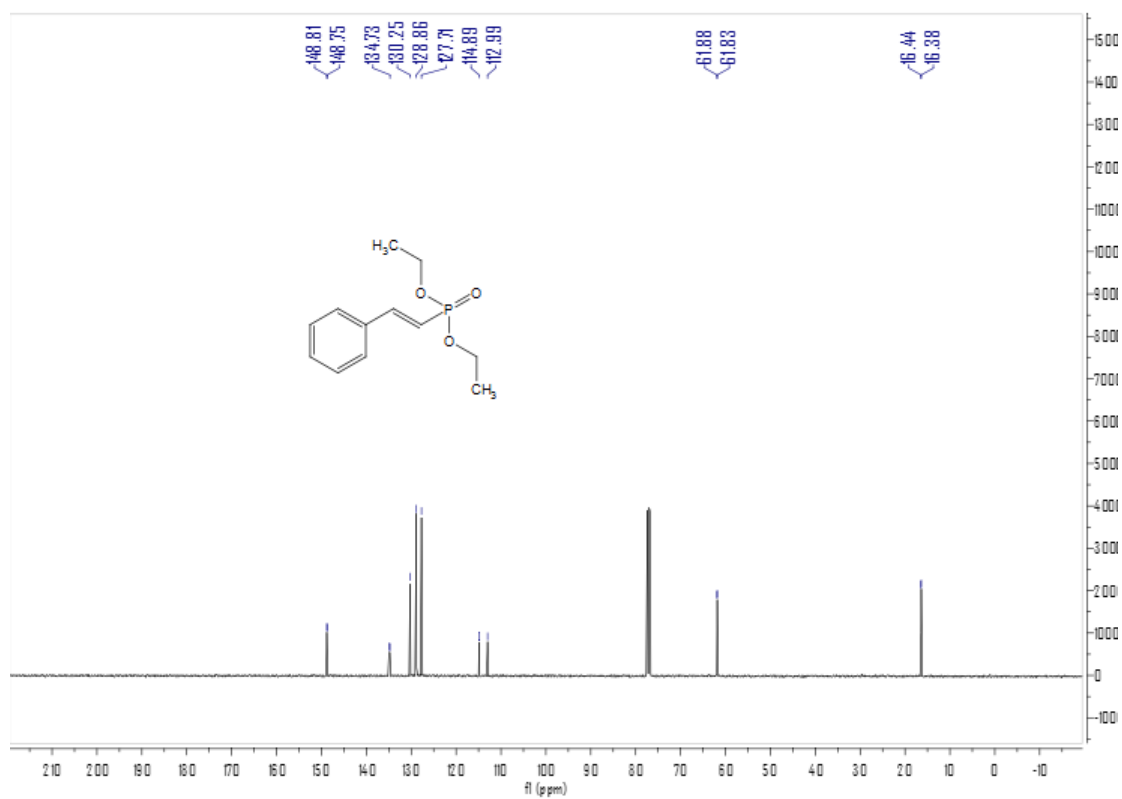

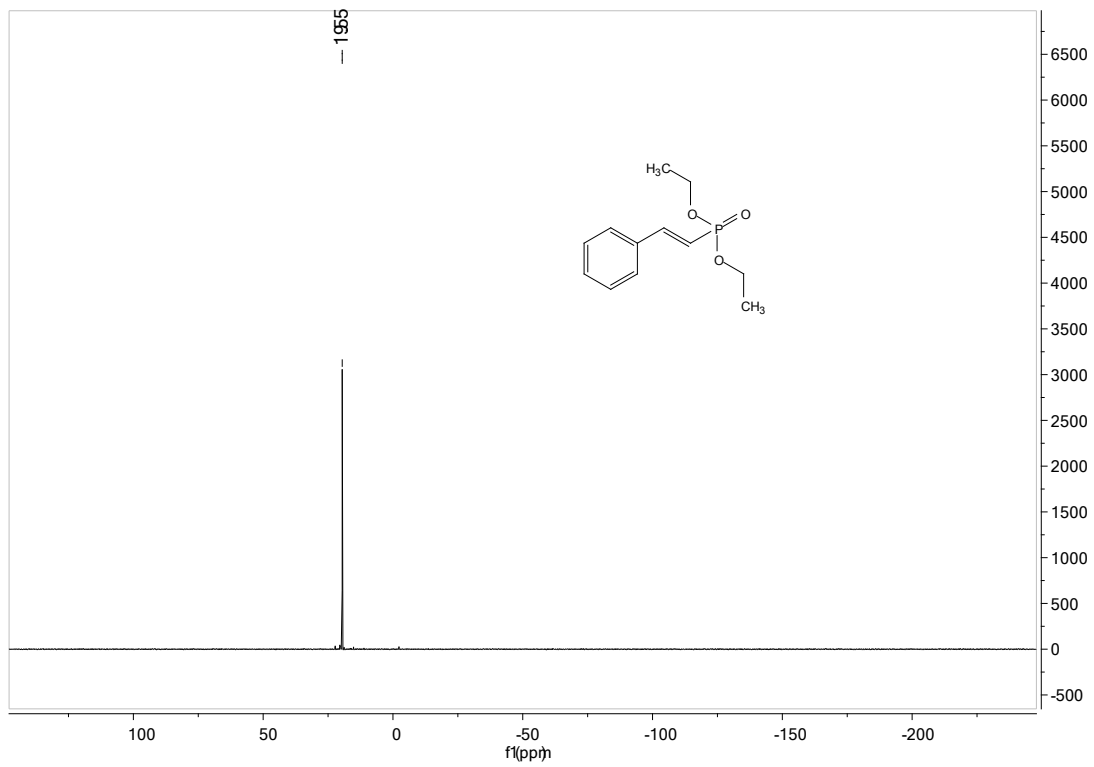

3b

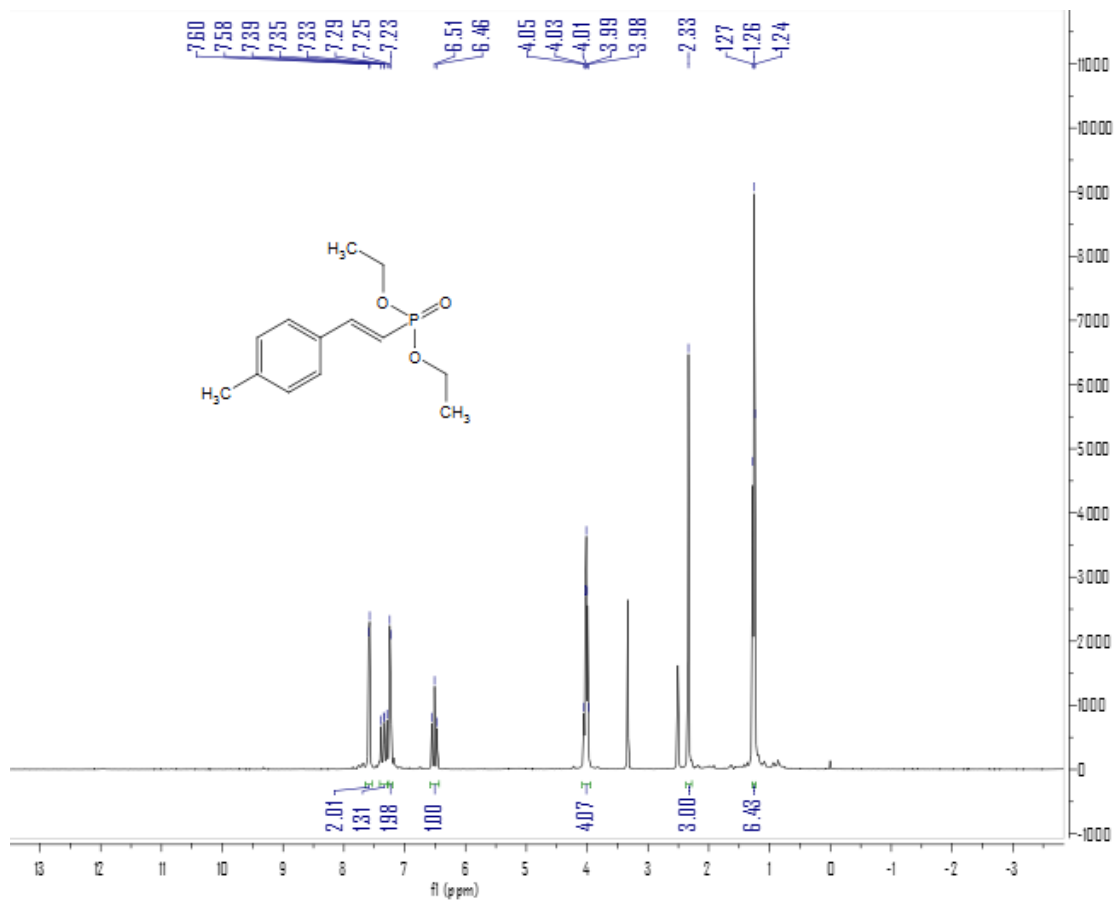

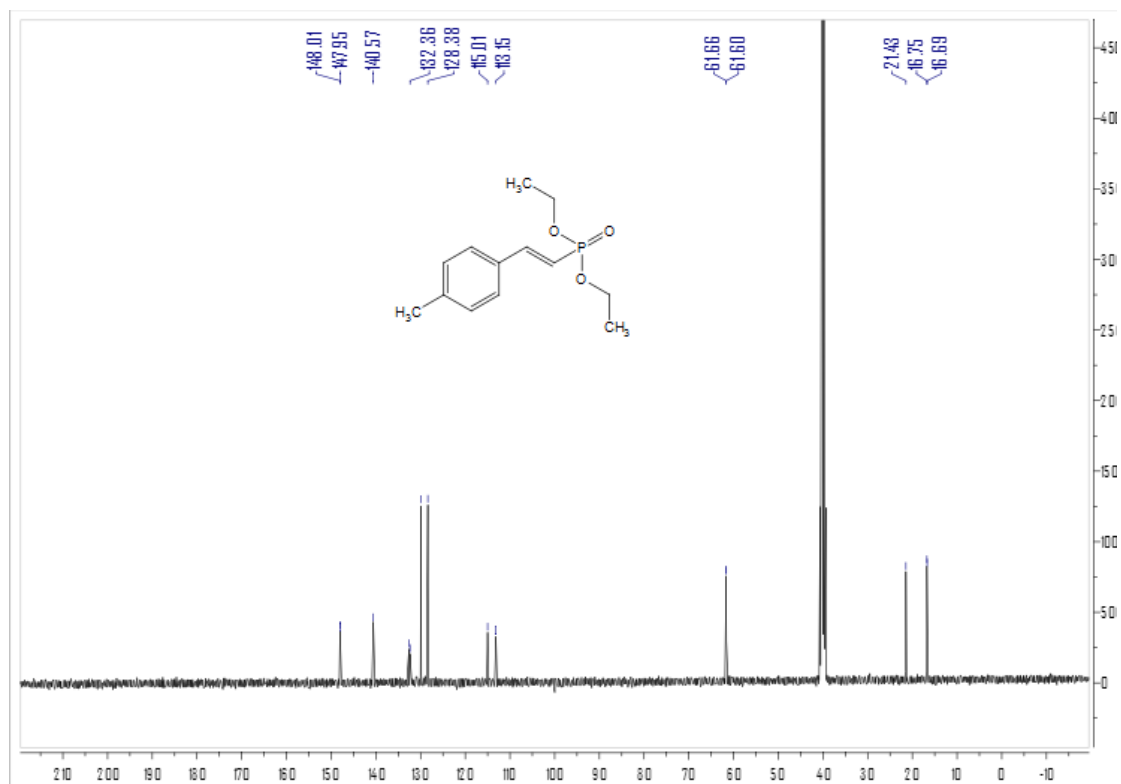

3c

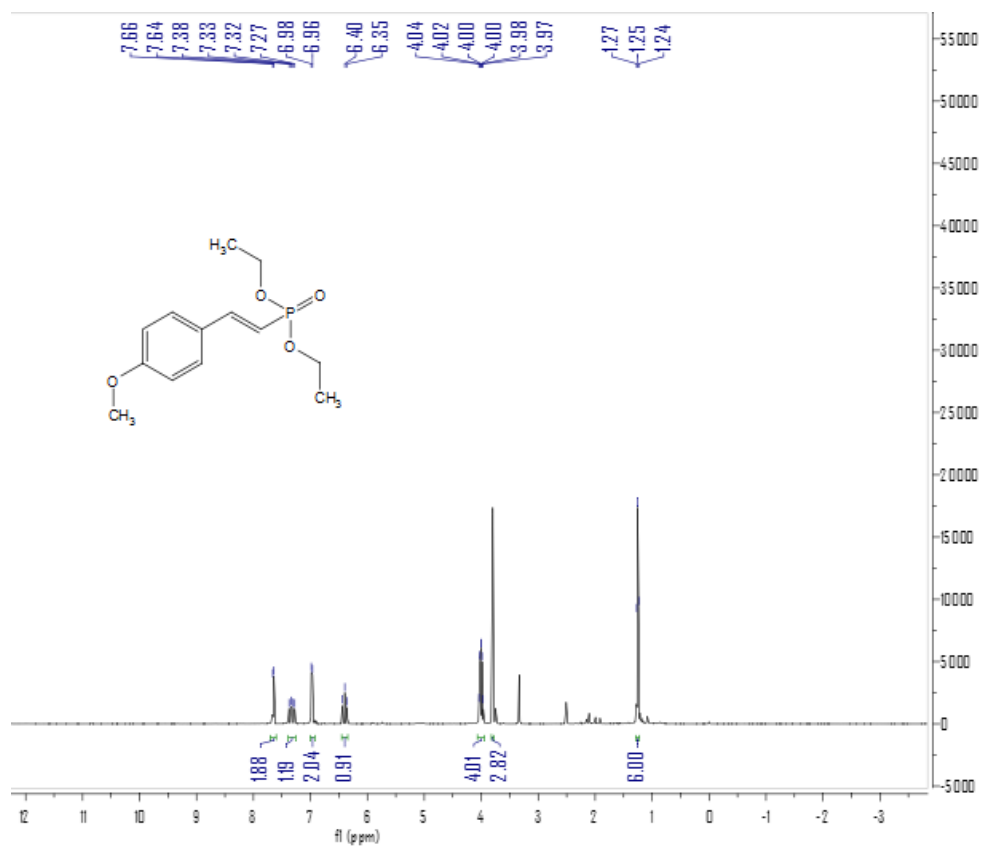

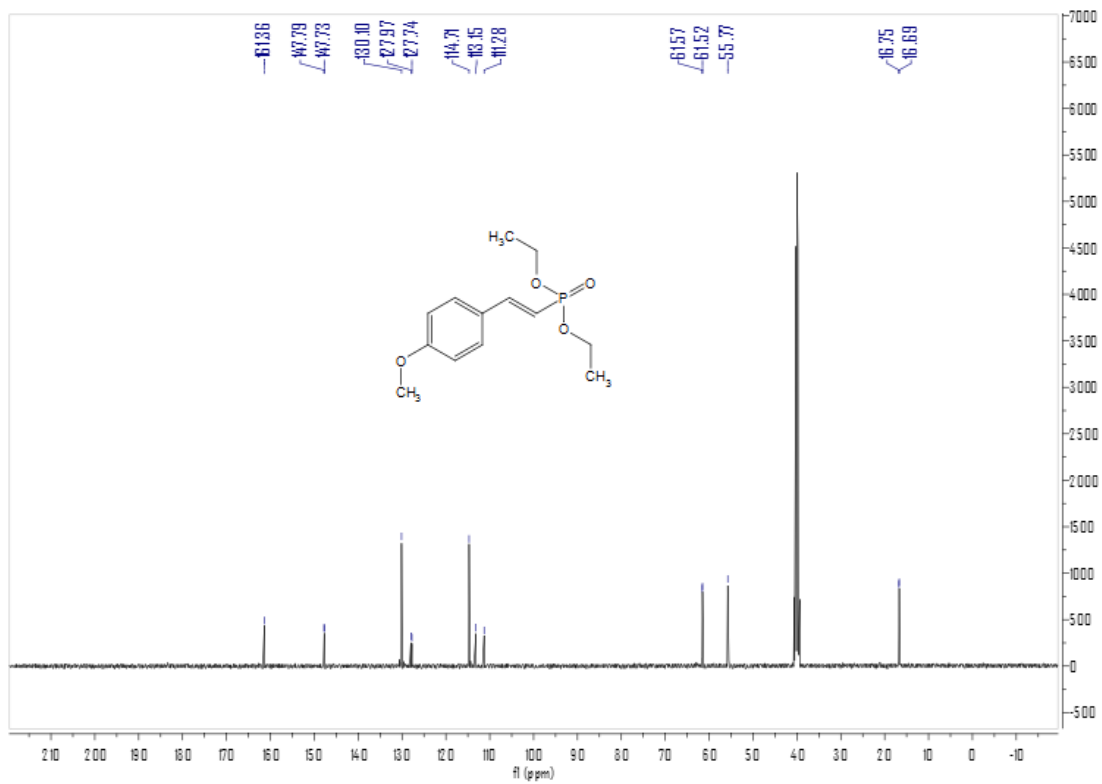

3d

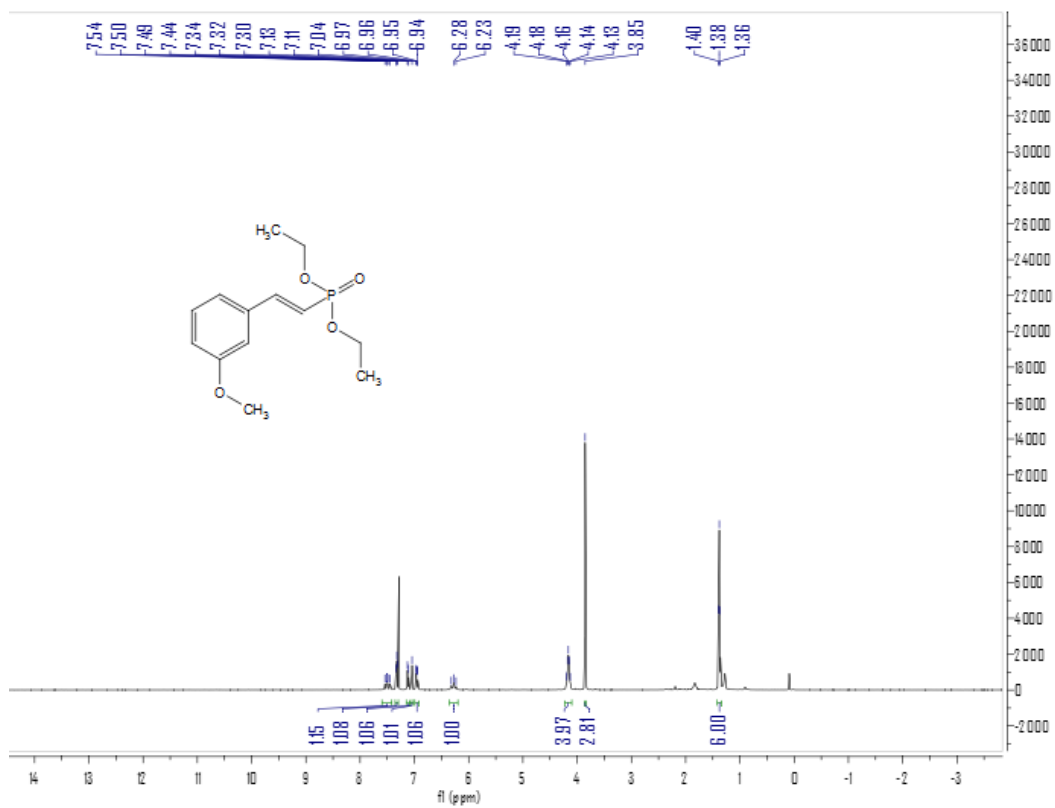

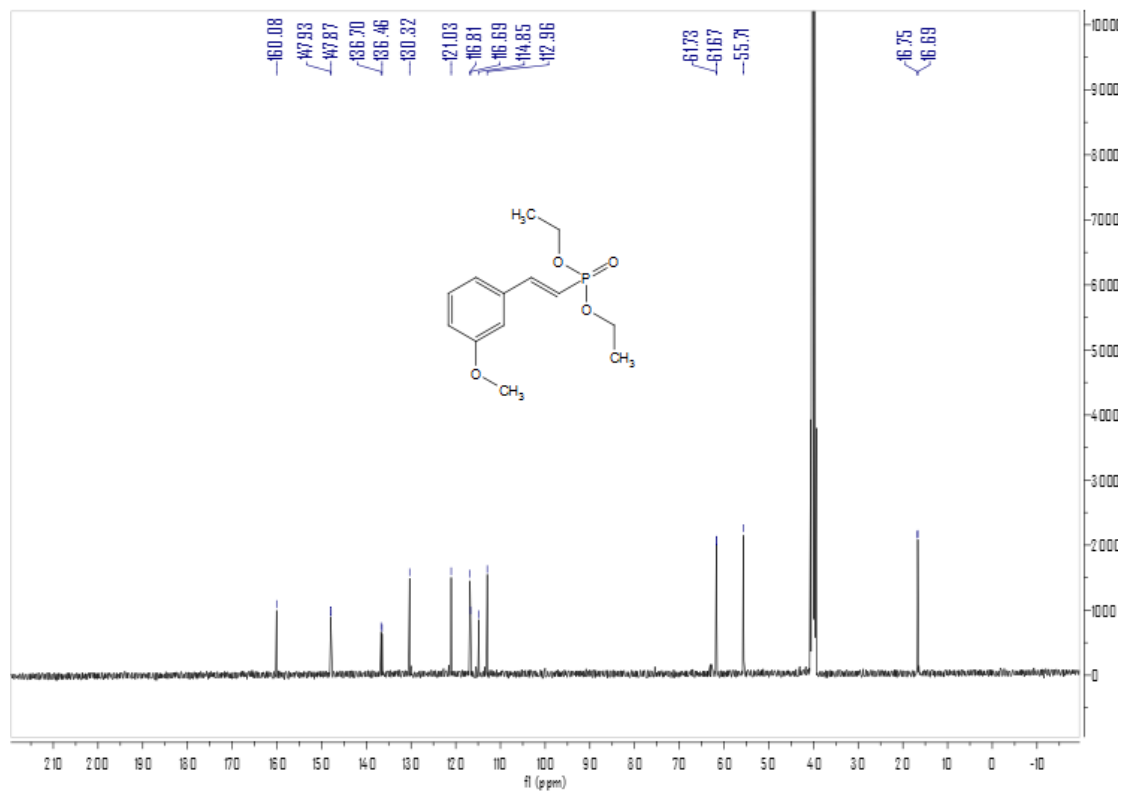

3e

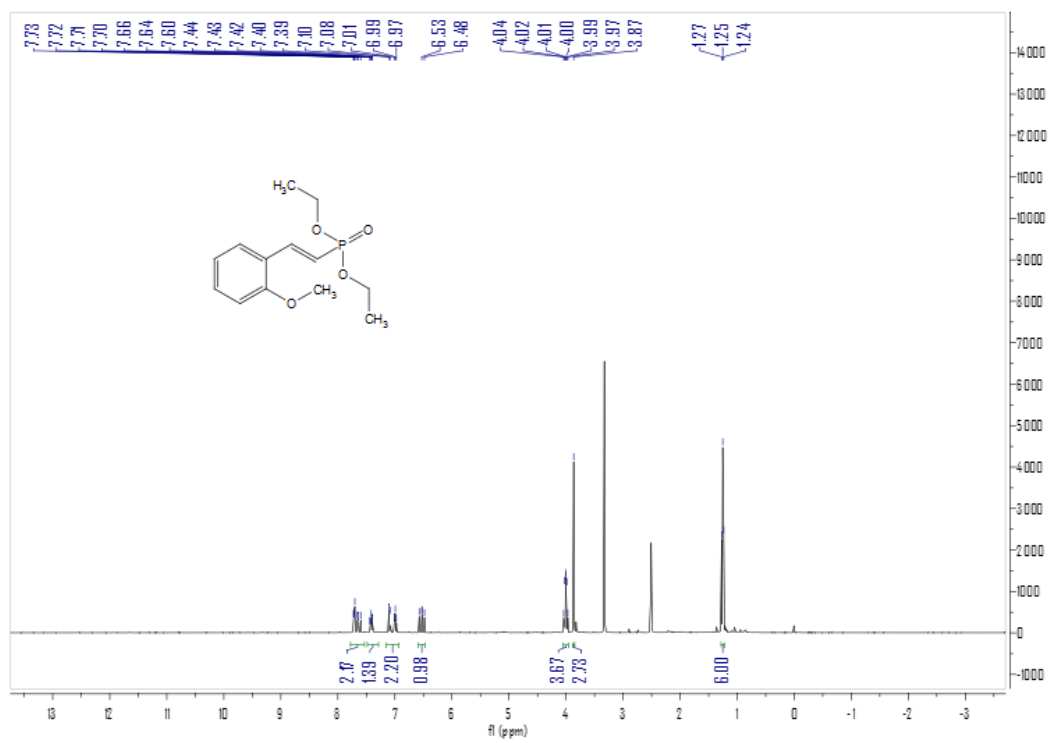

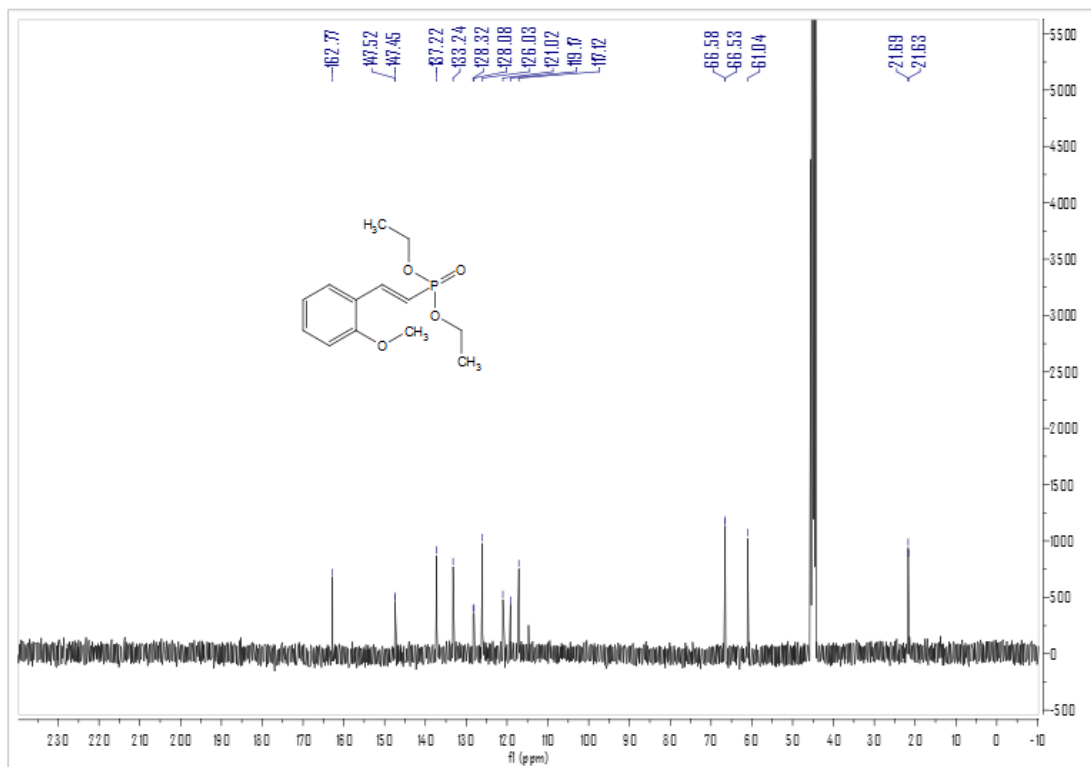

3f

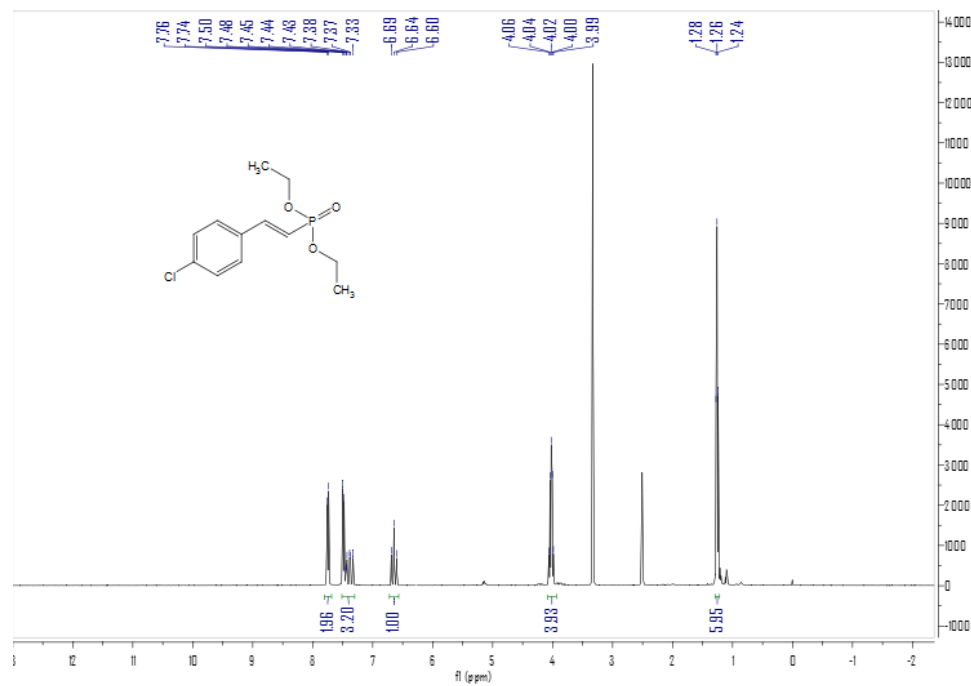

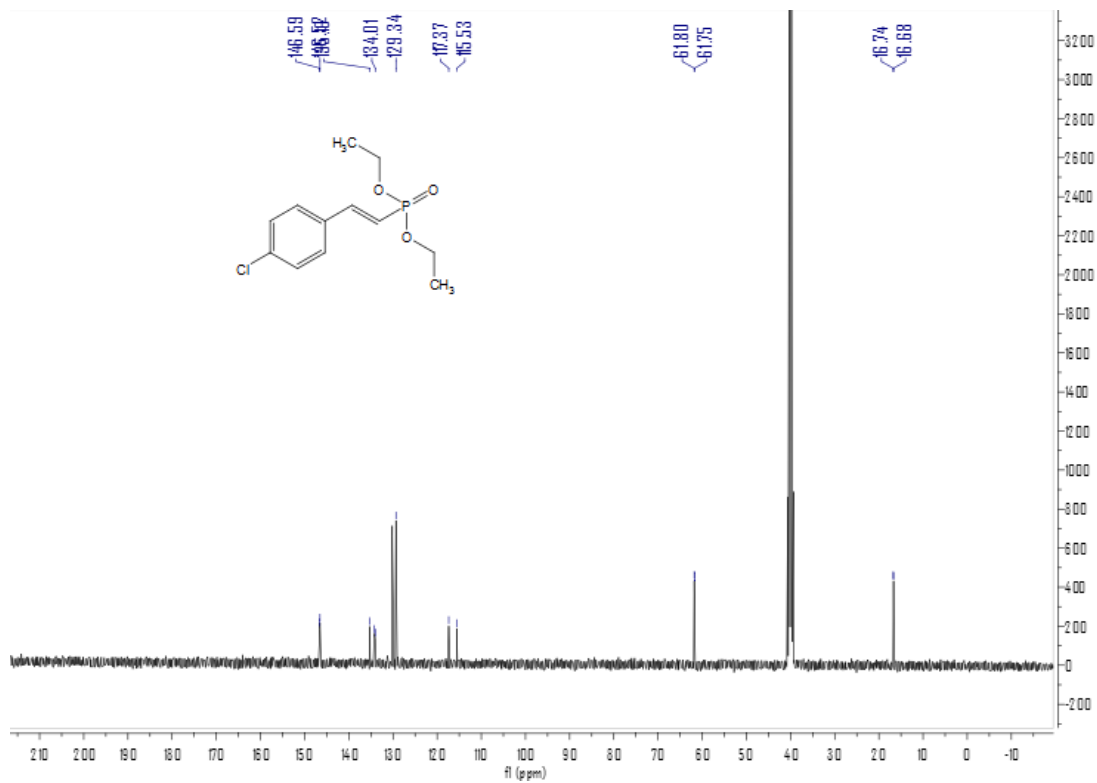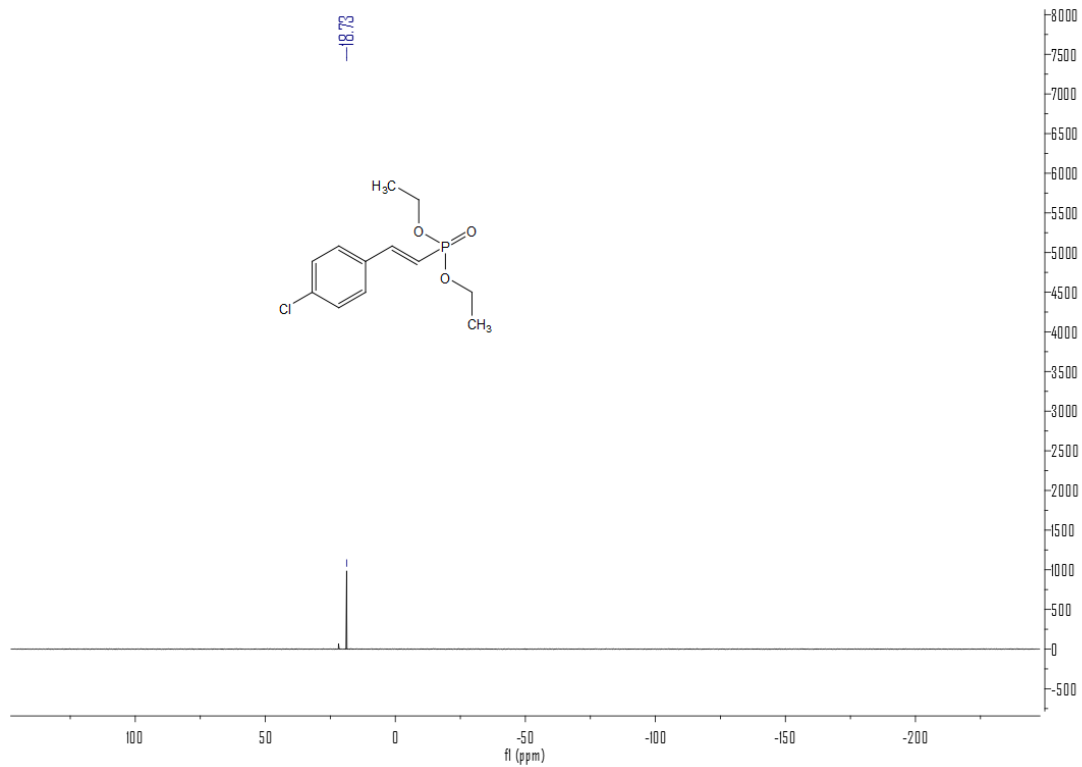

3g

S8



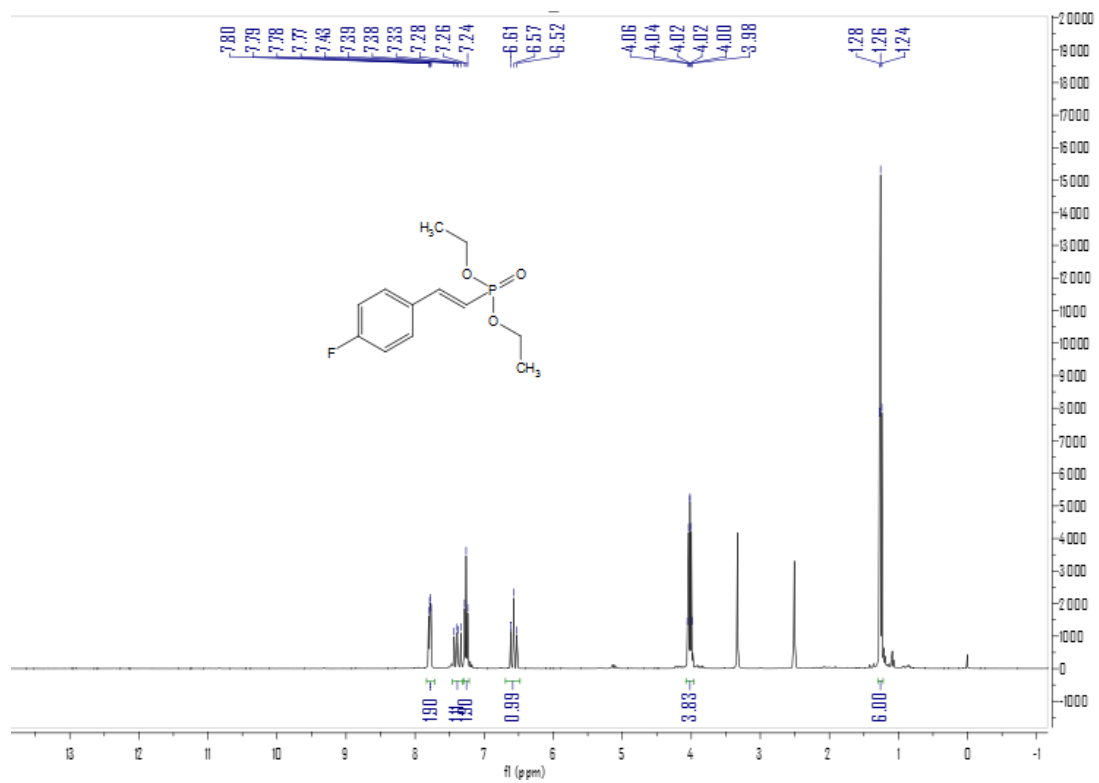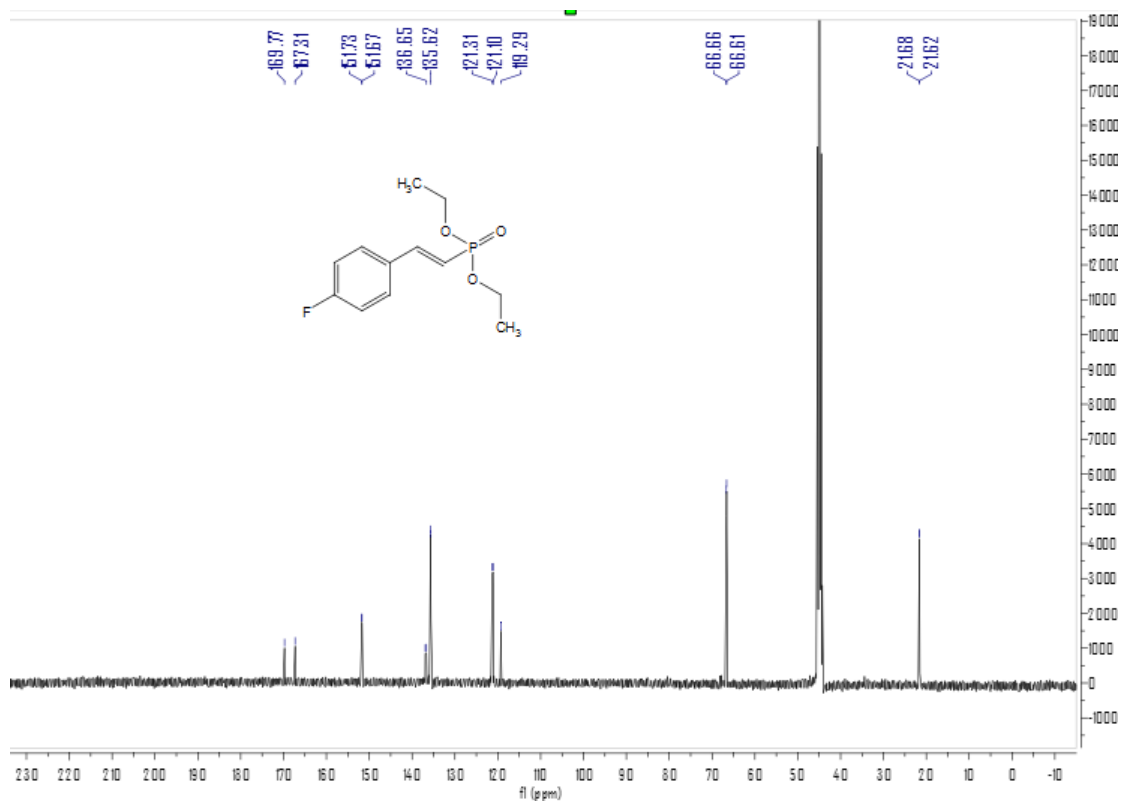

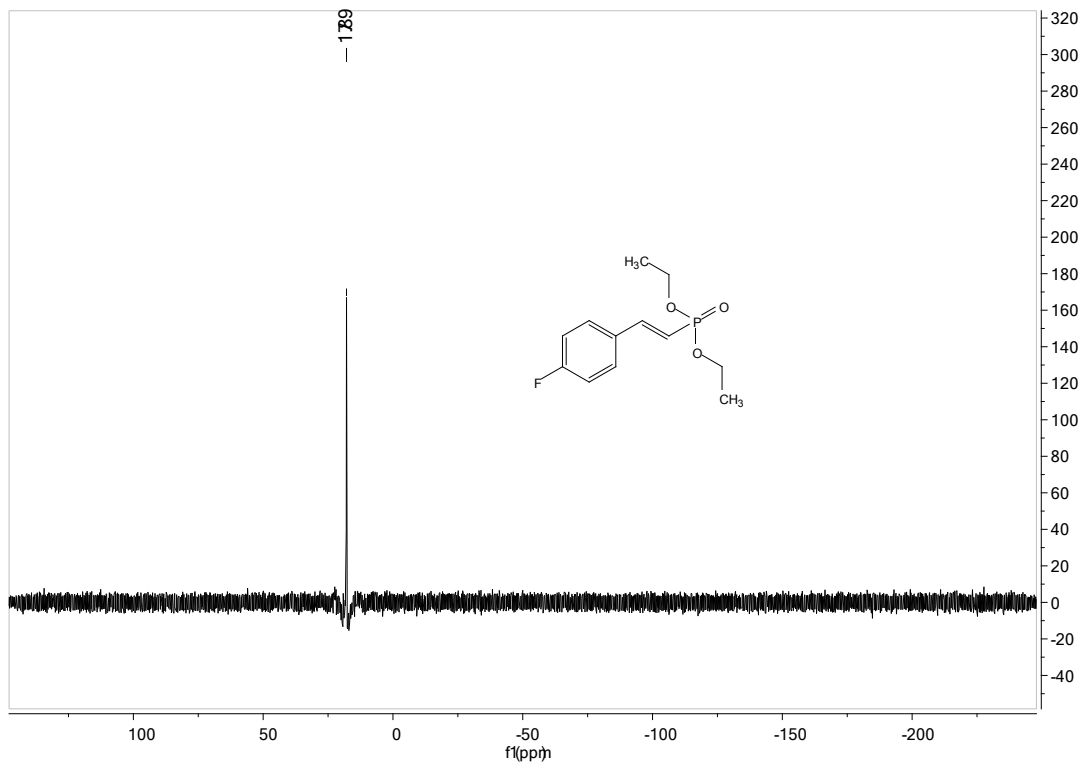

3h

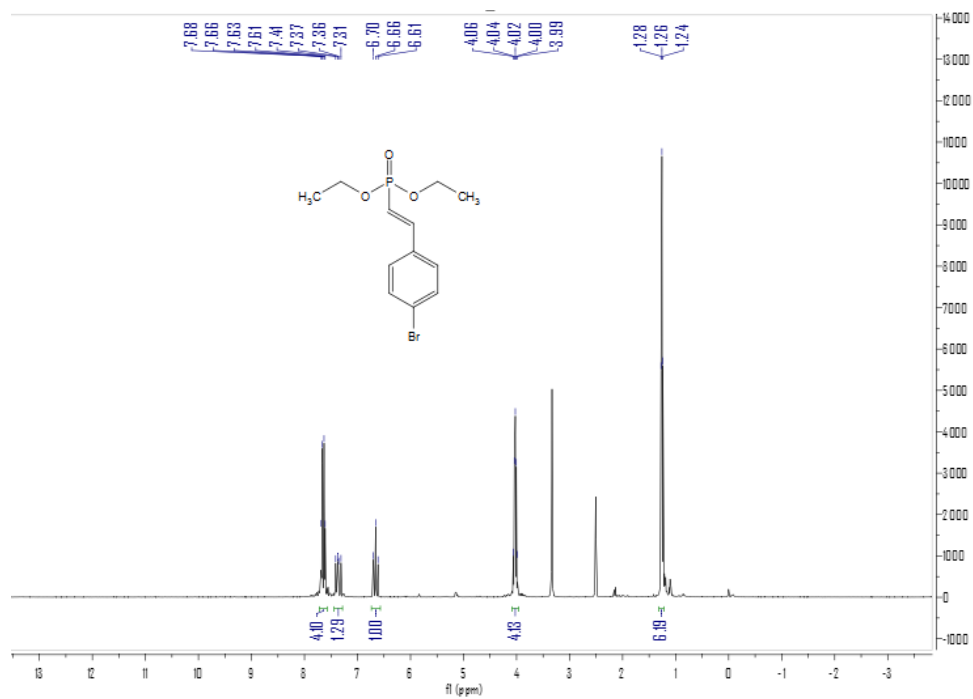

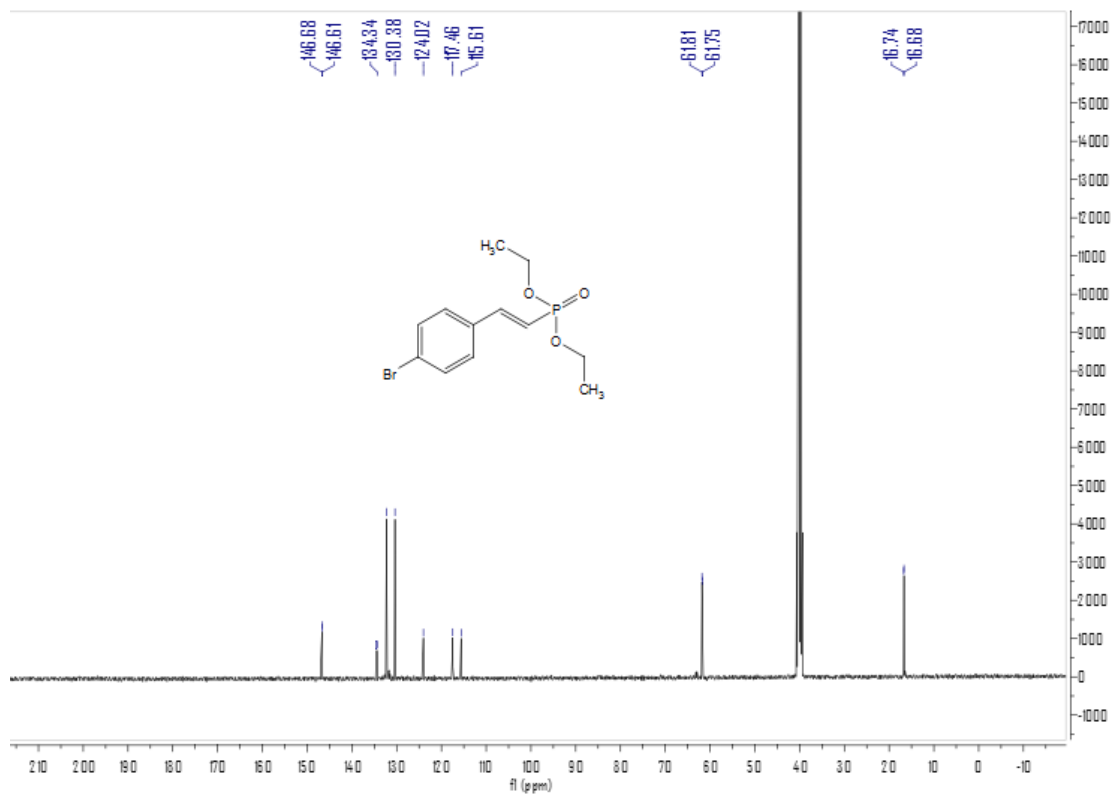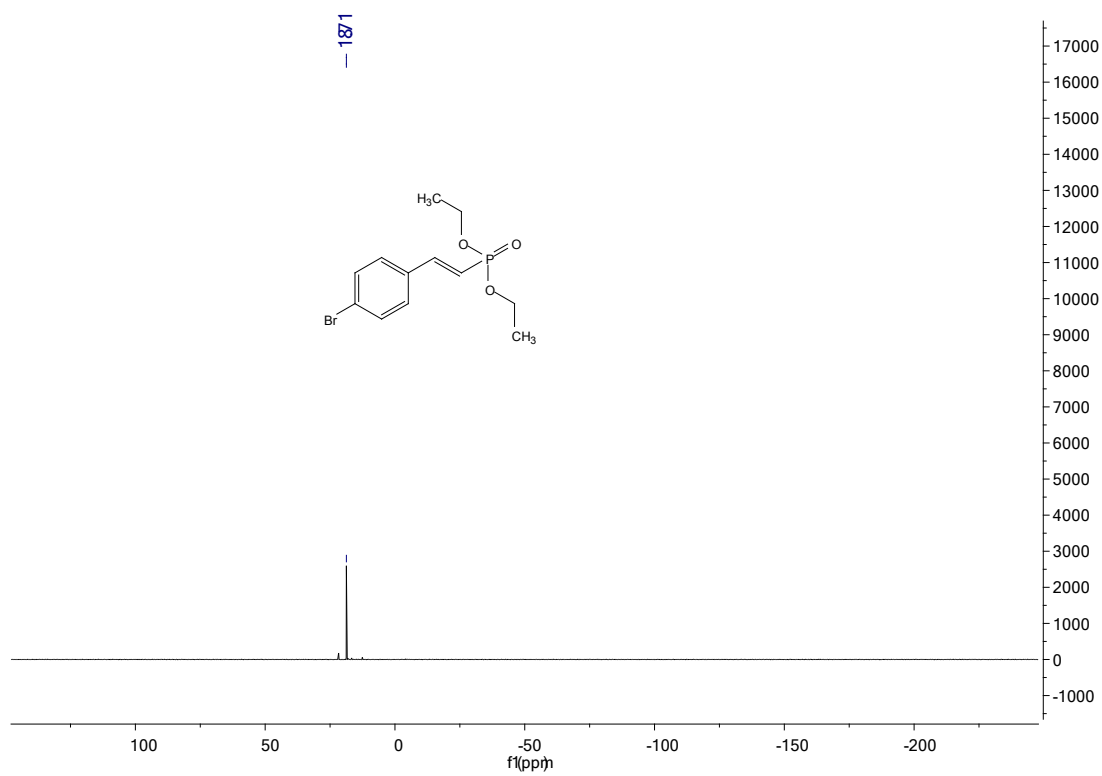

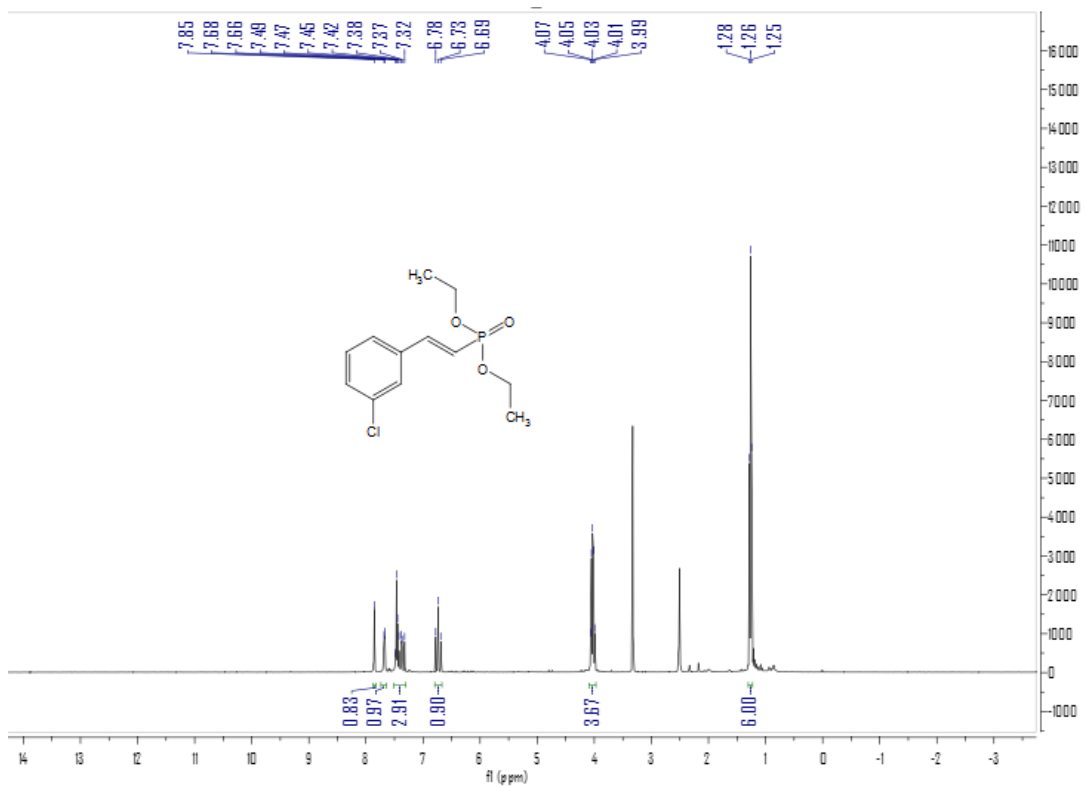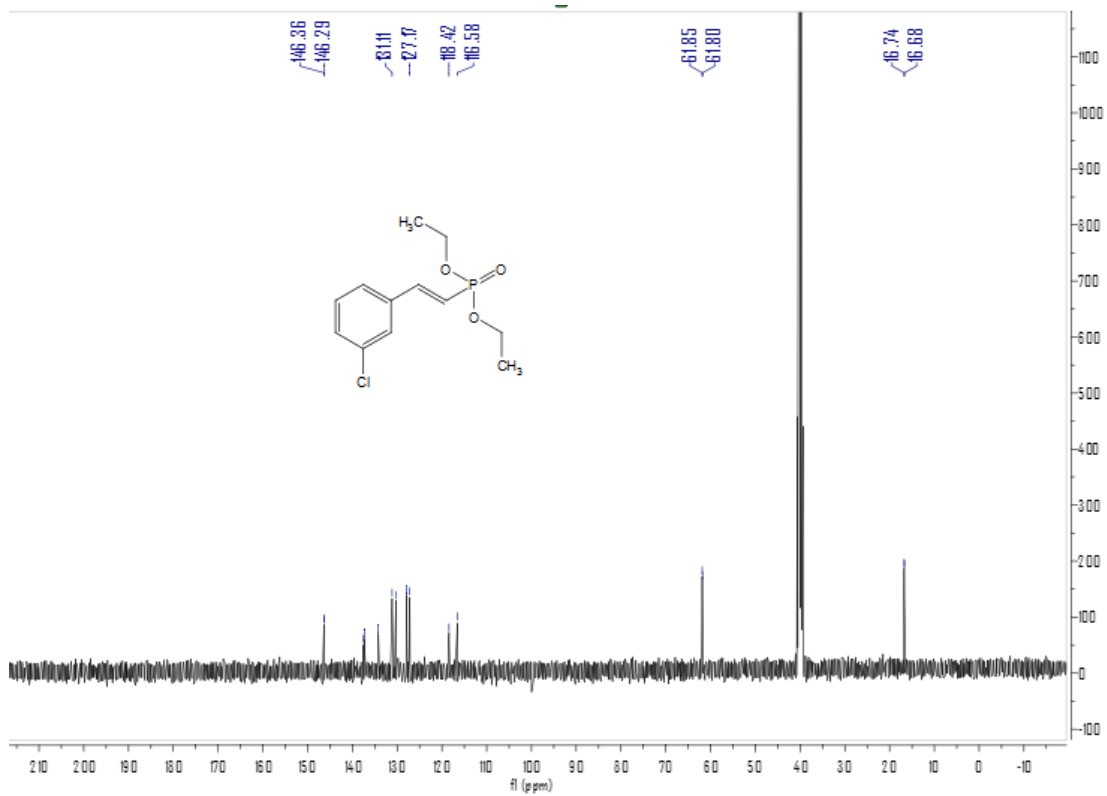

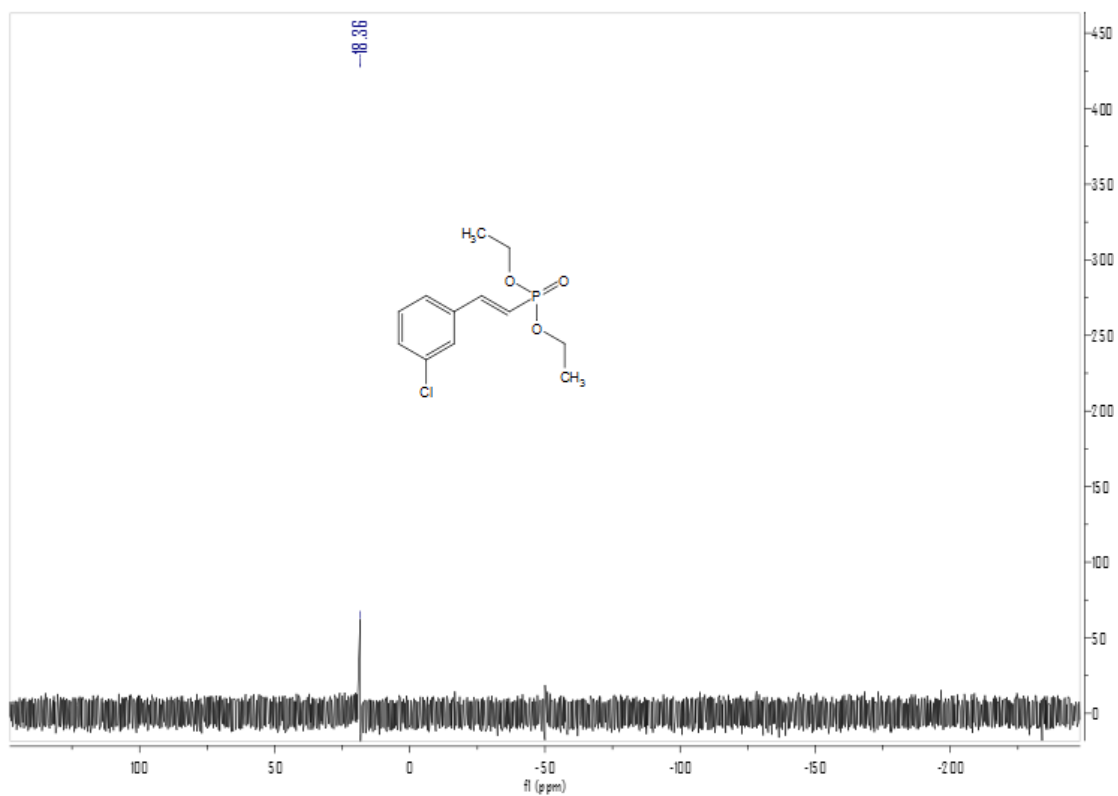

3j

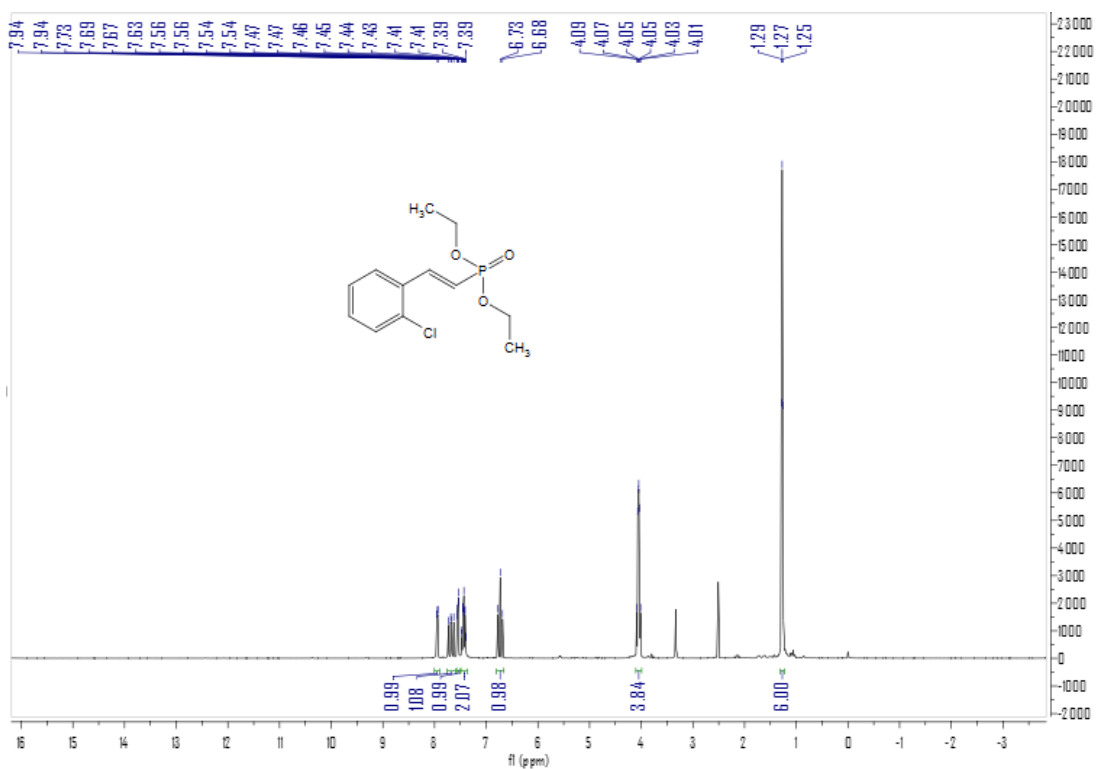

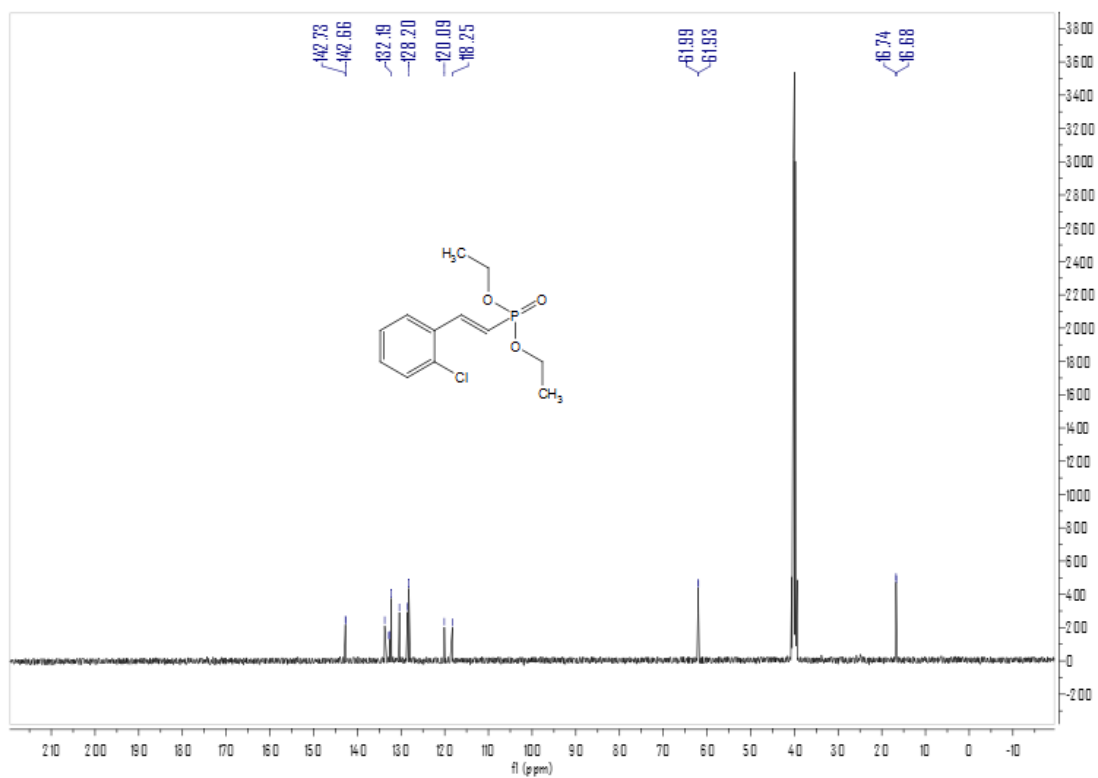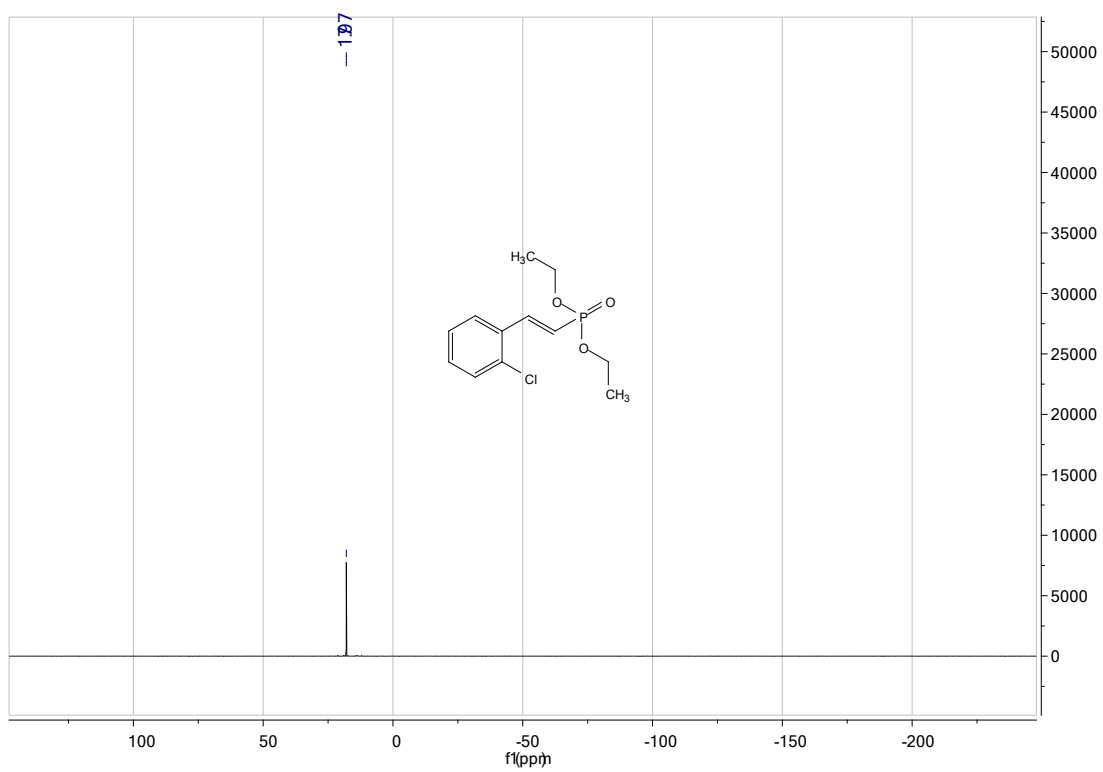

3k

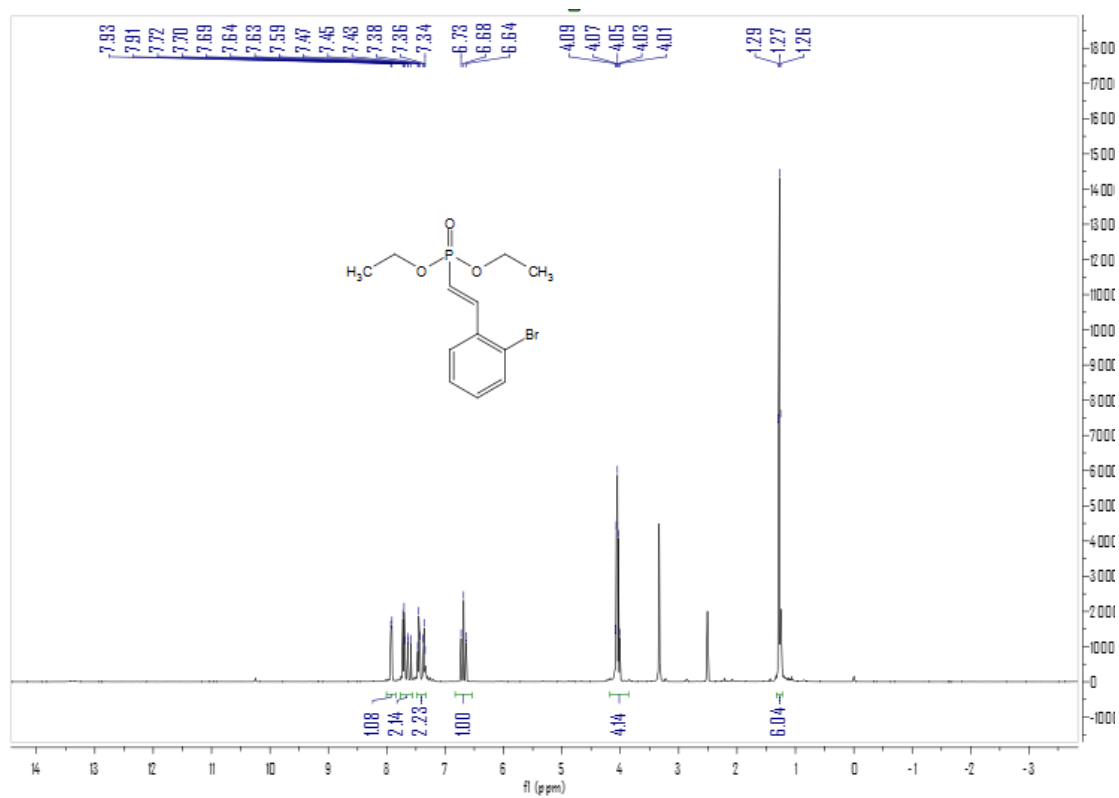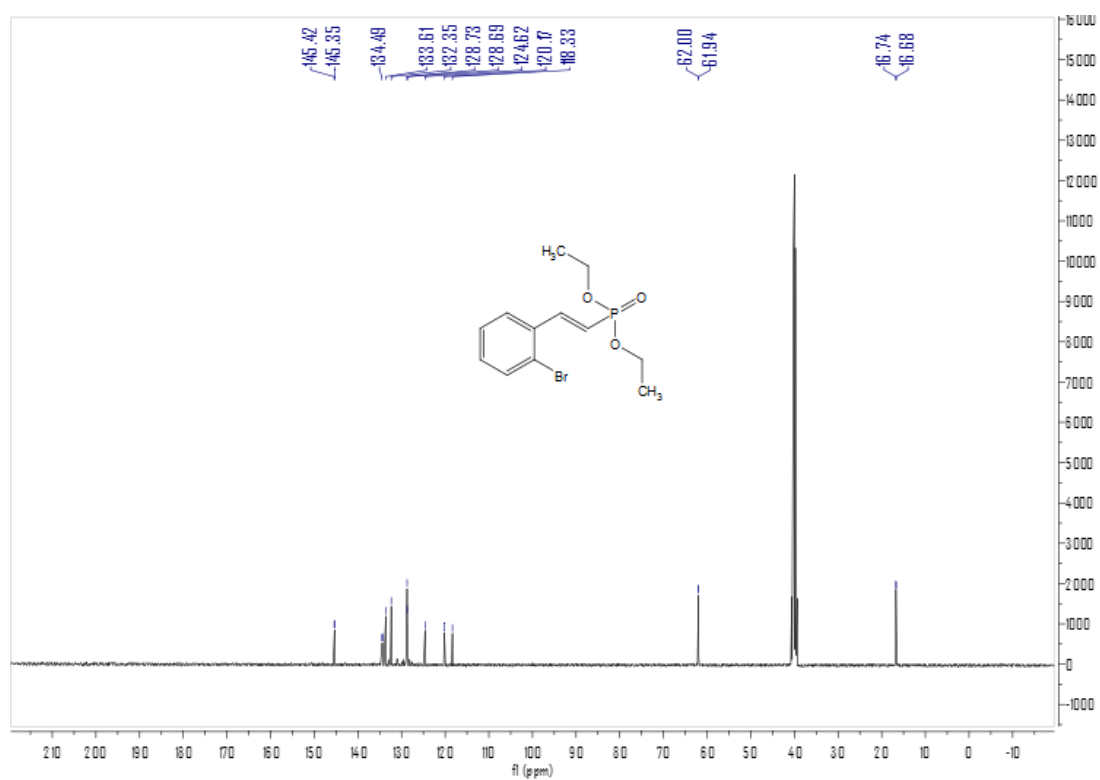

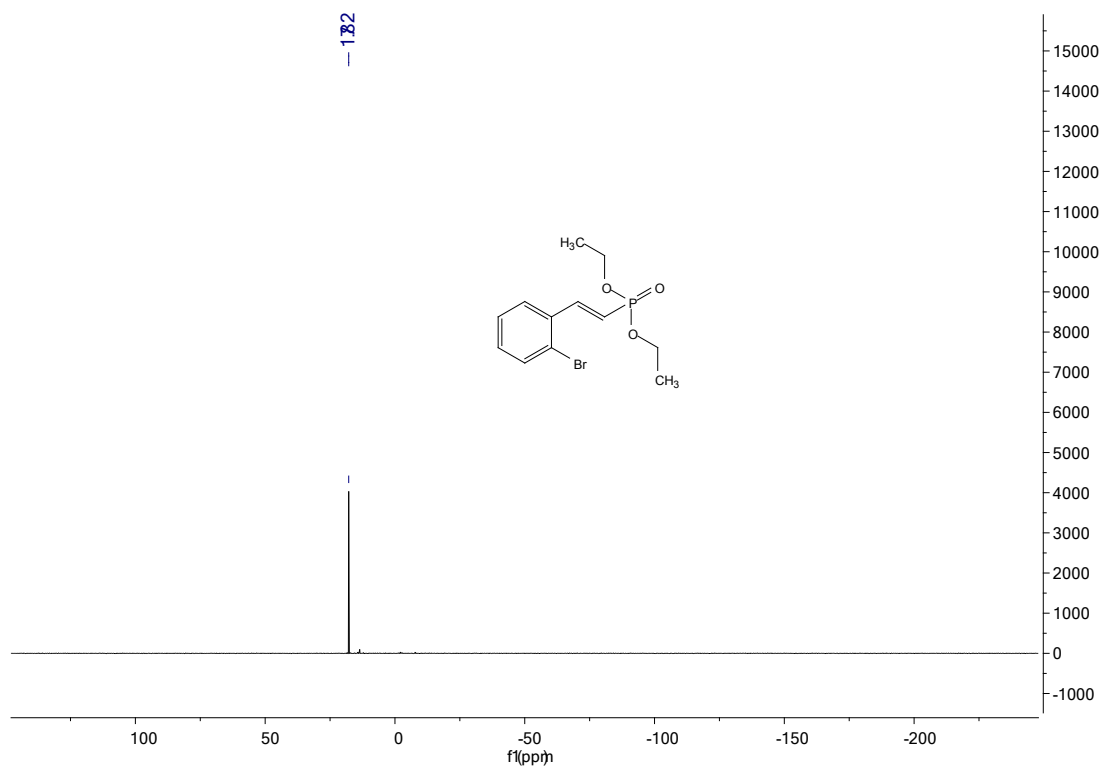

31

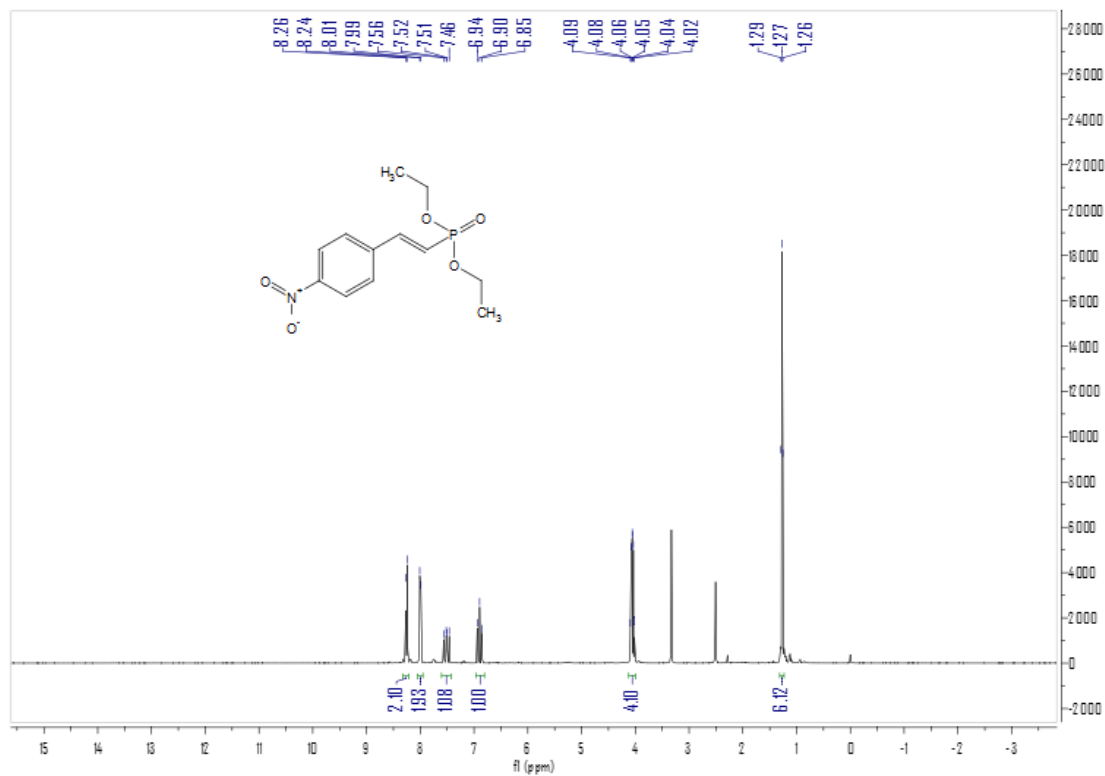



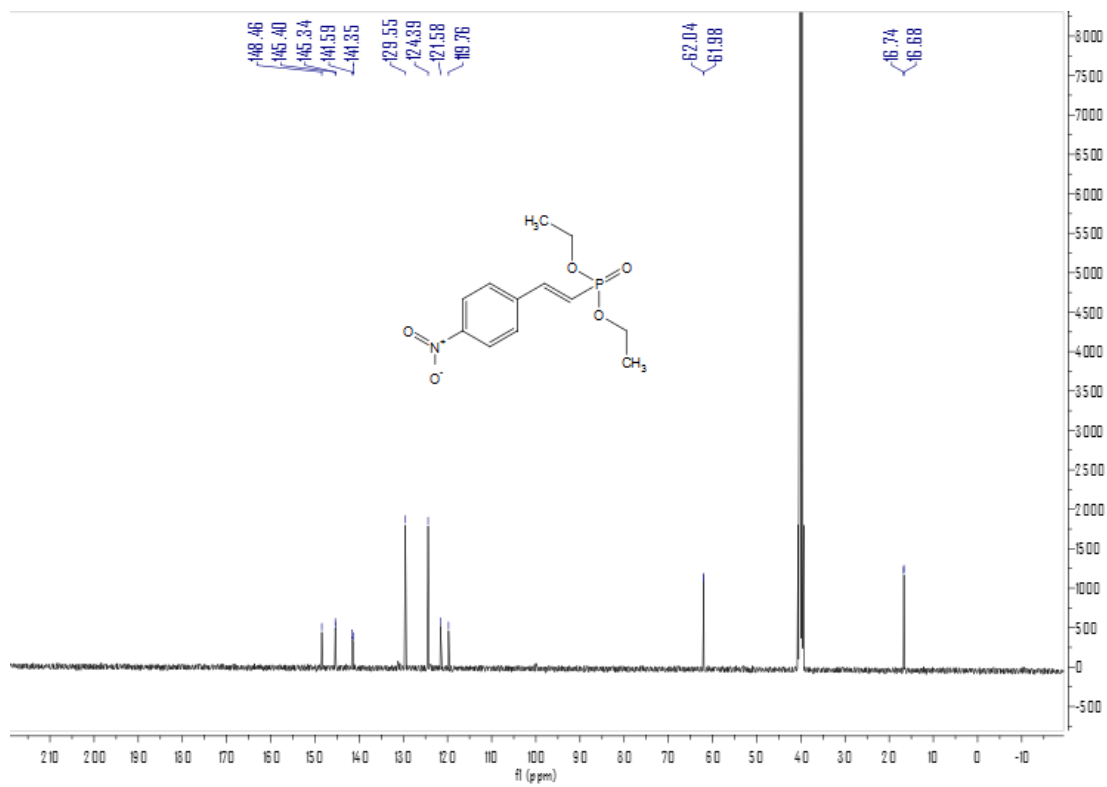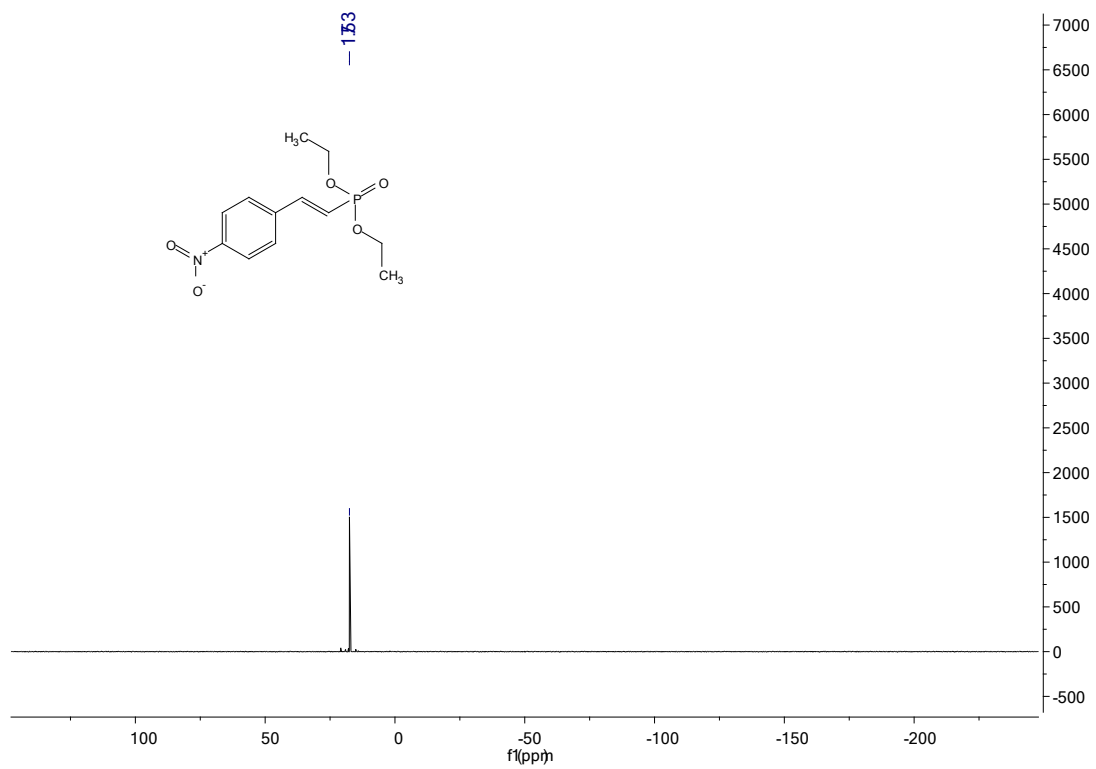

3m

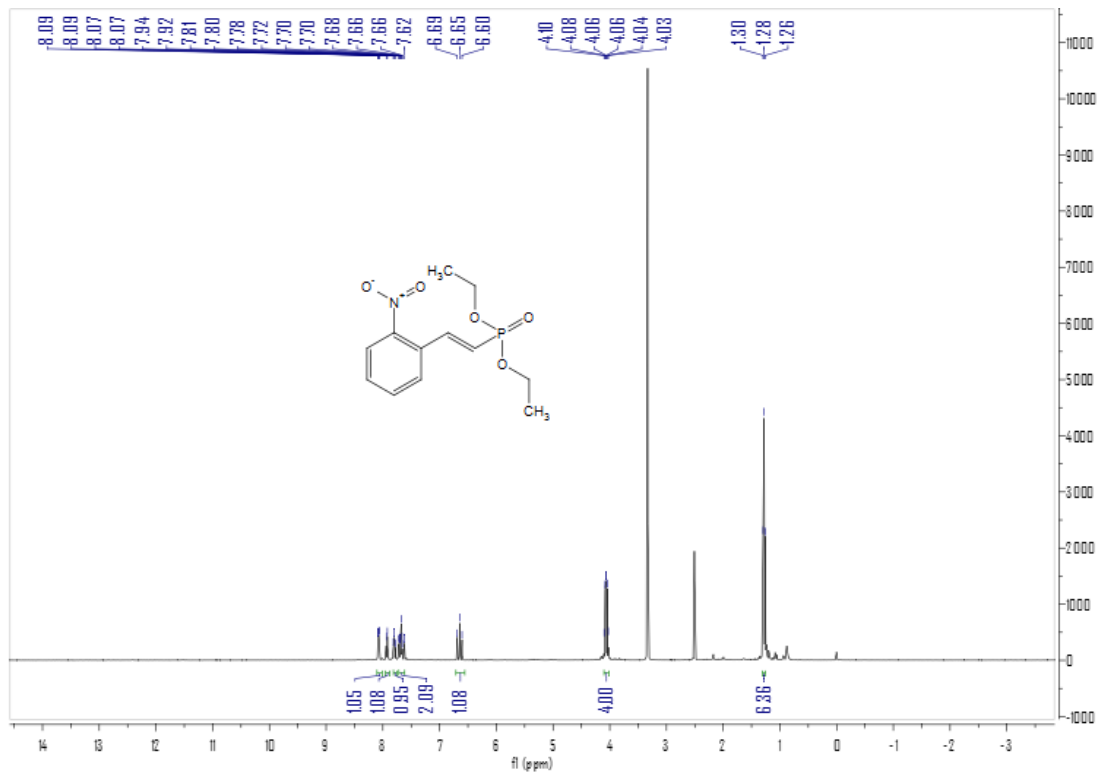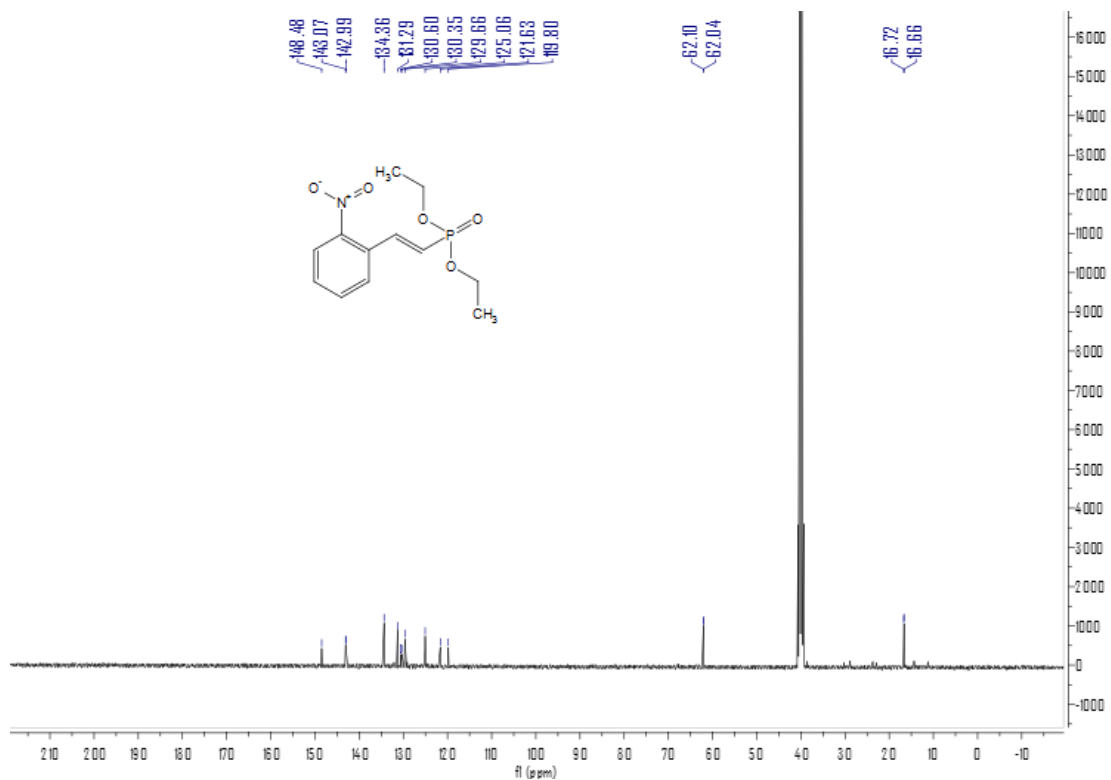

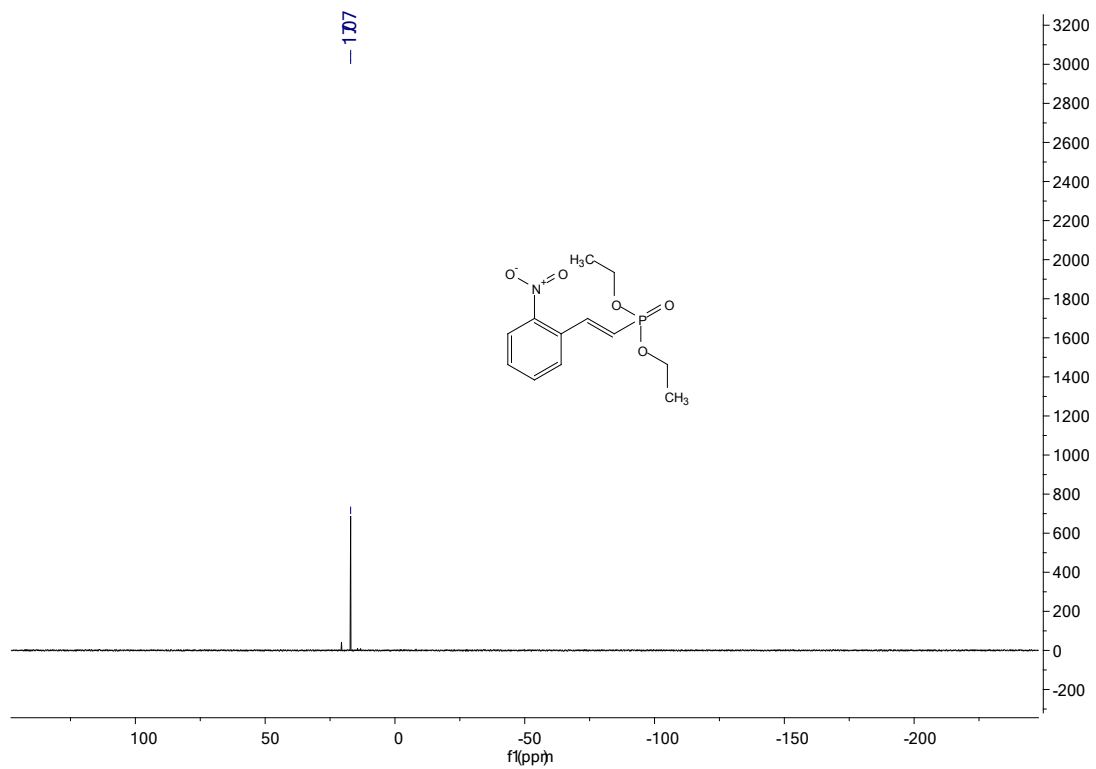

3n

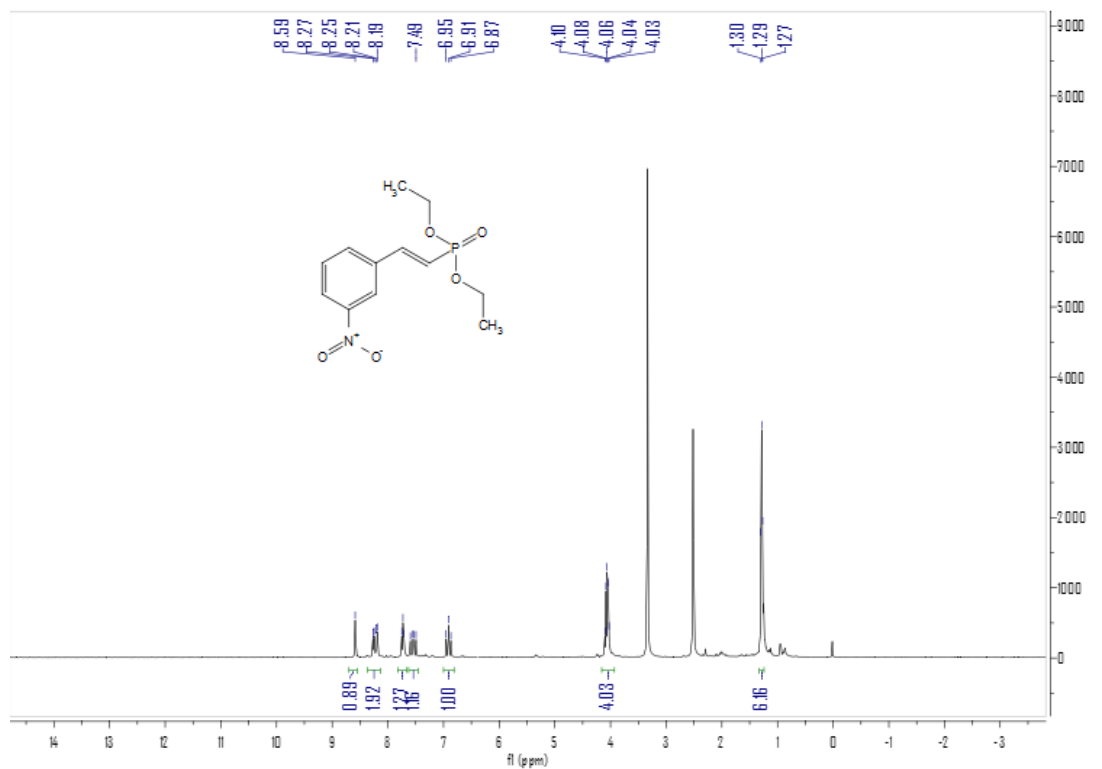

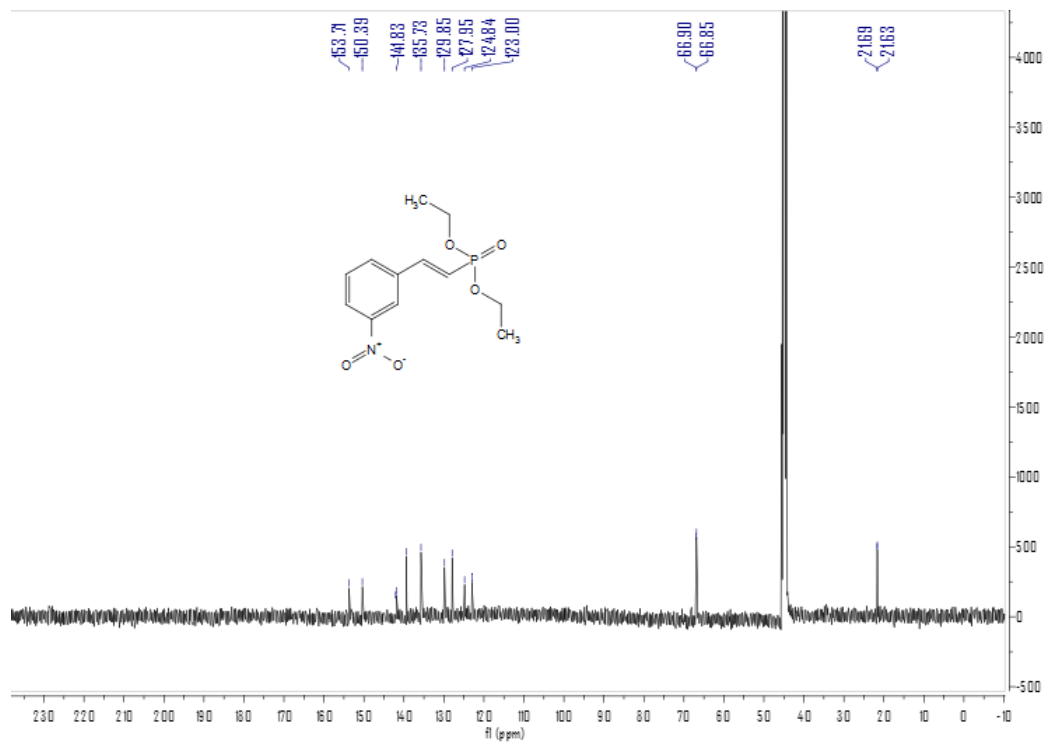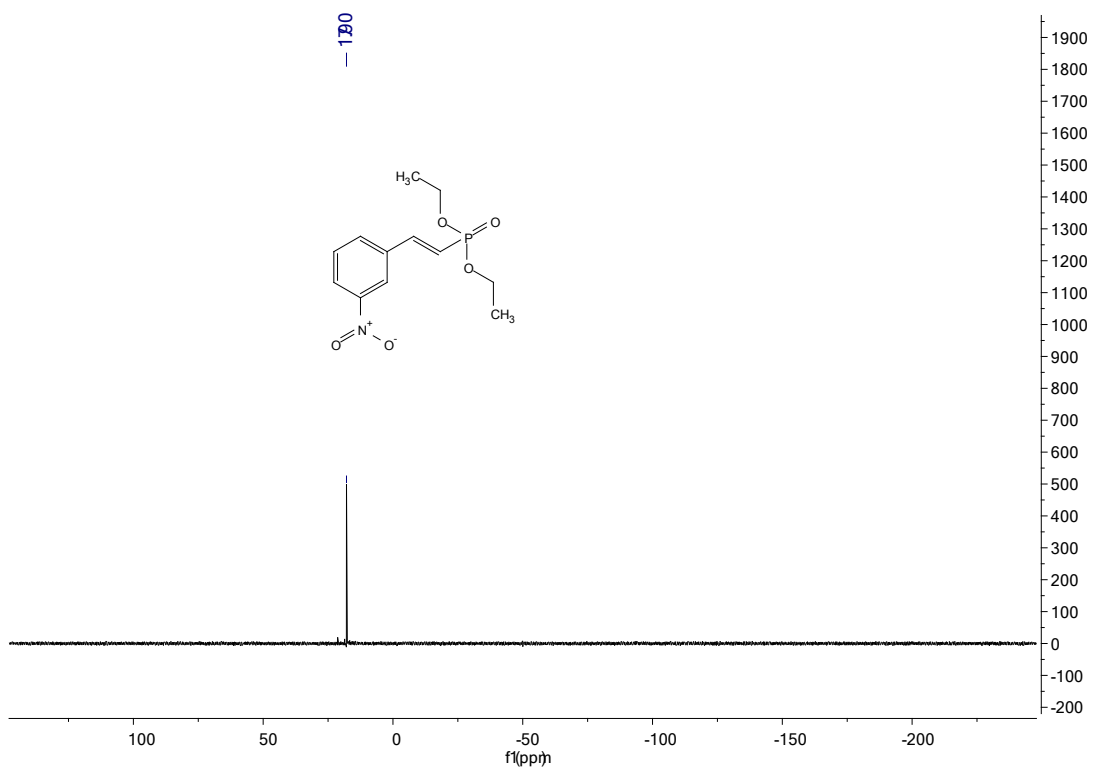

3o

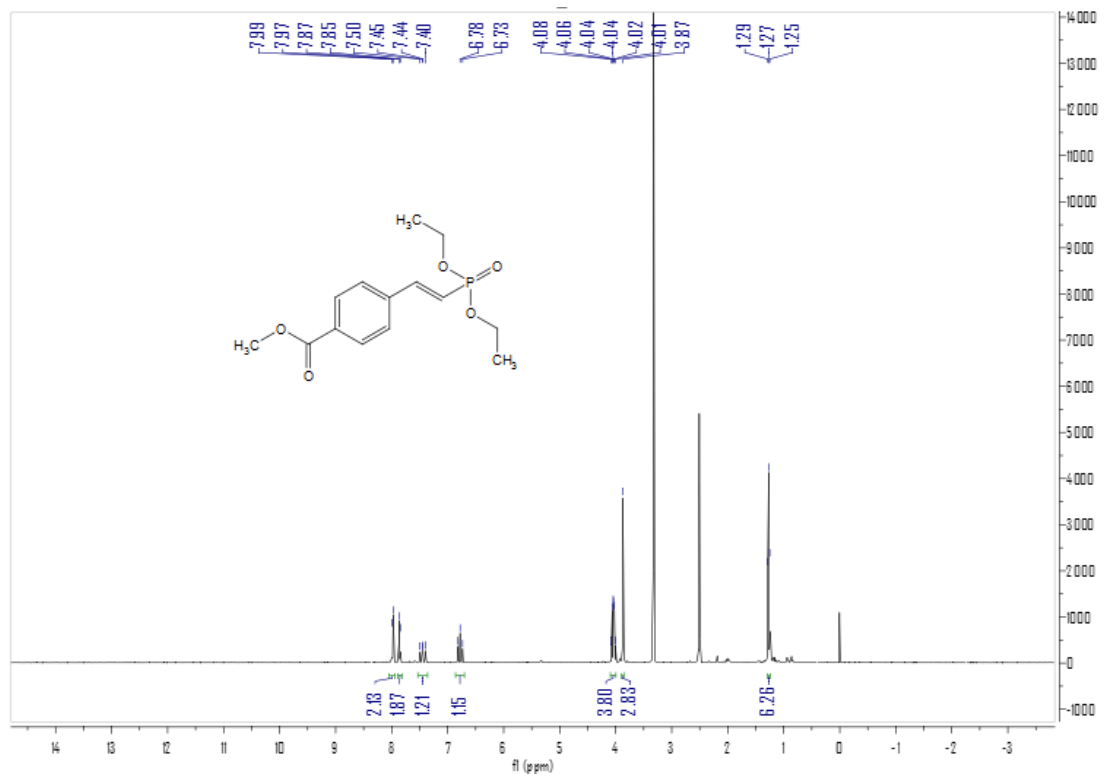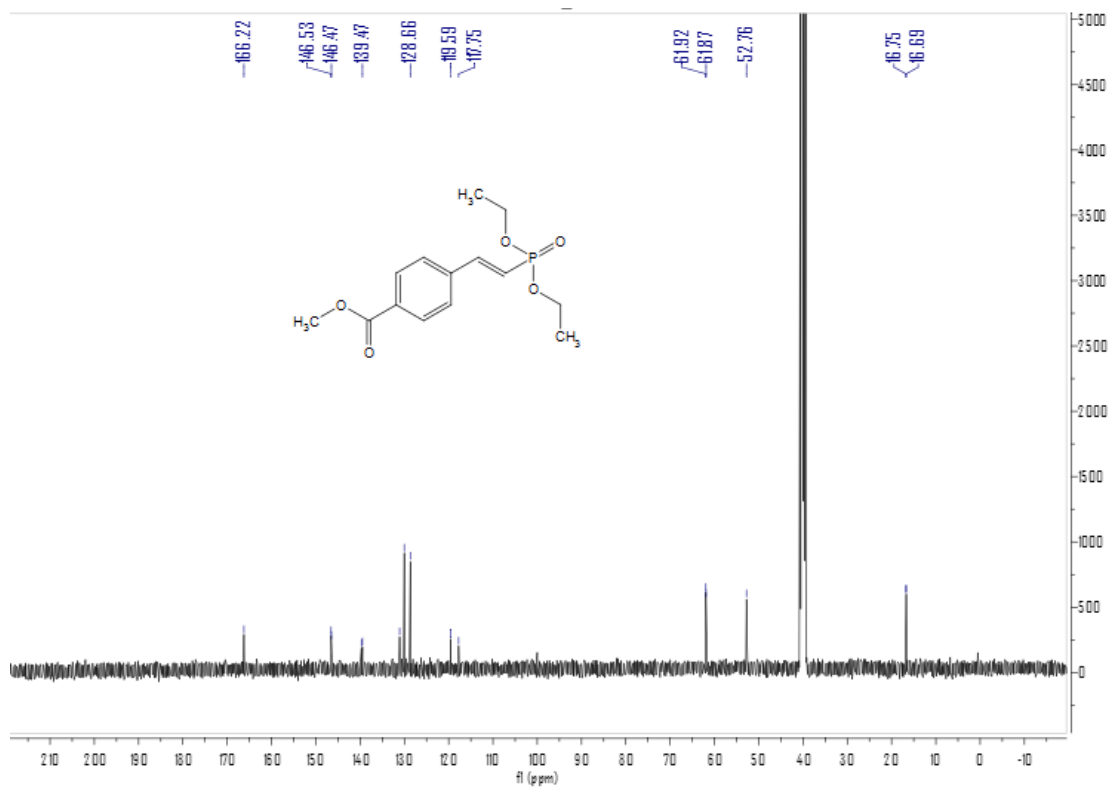

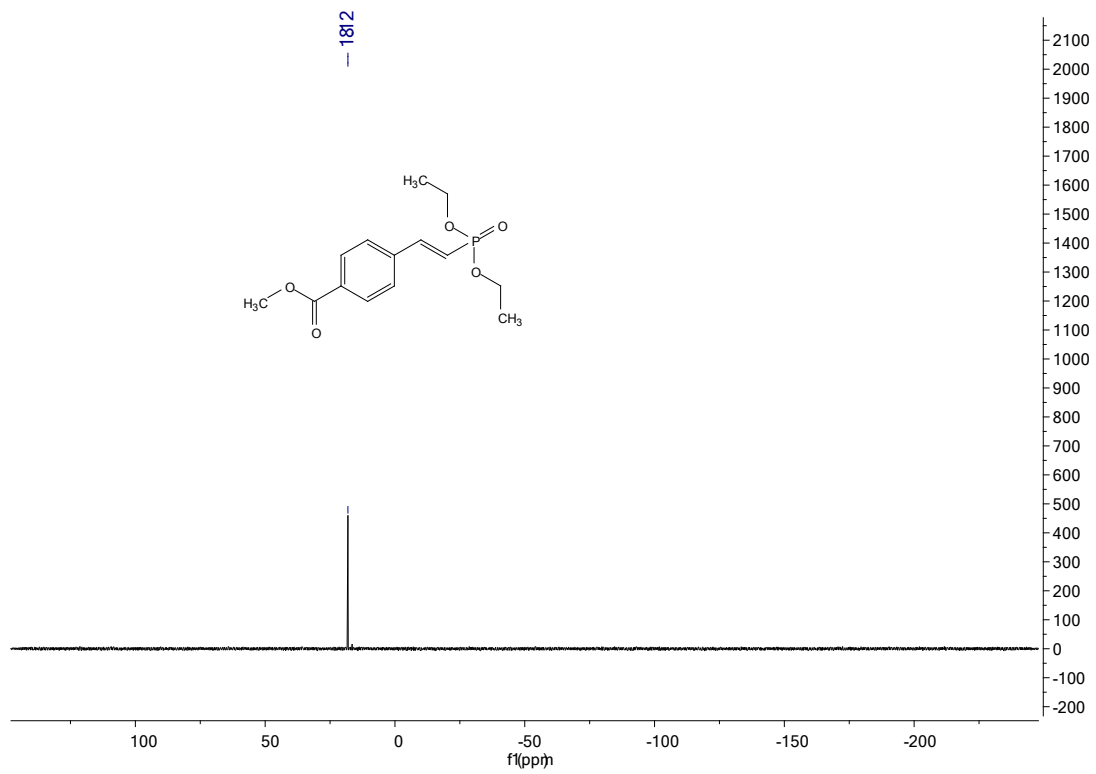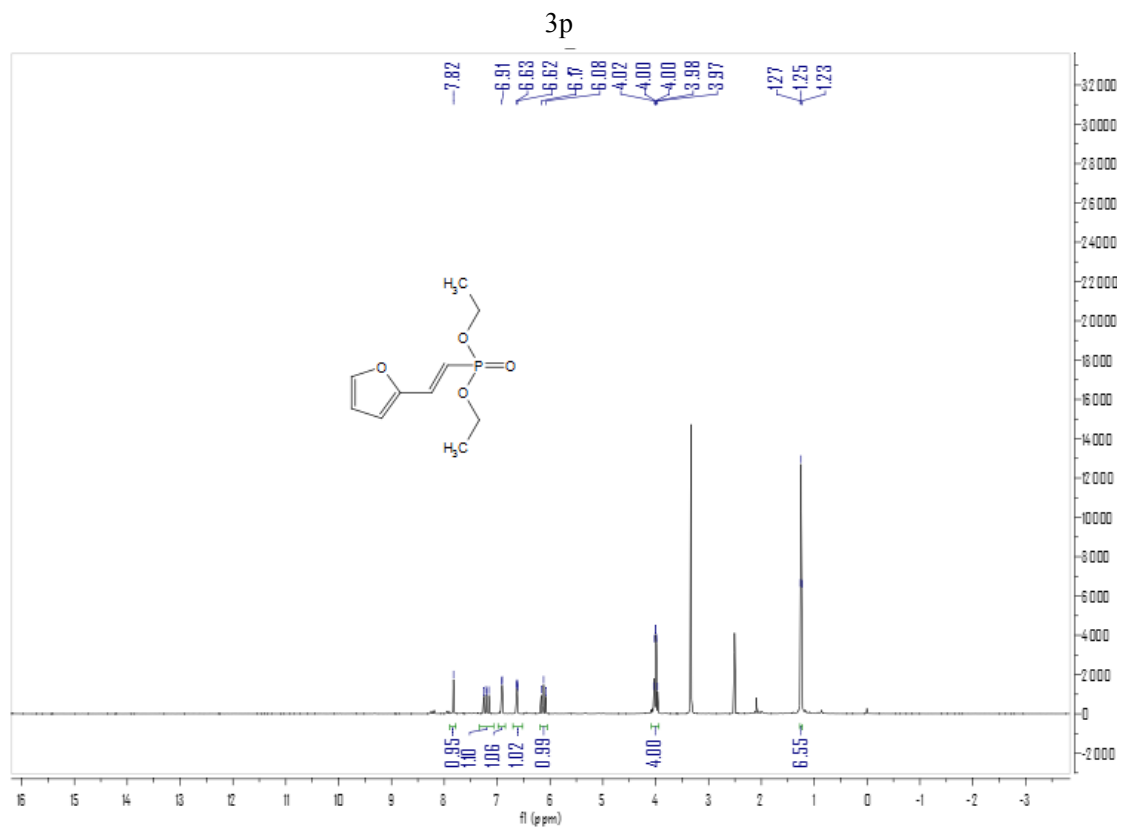

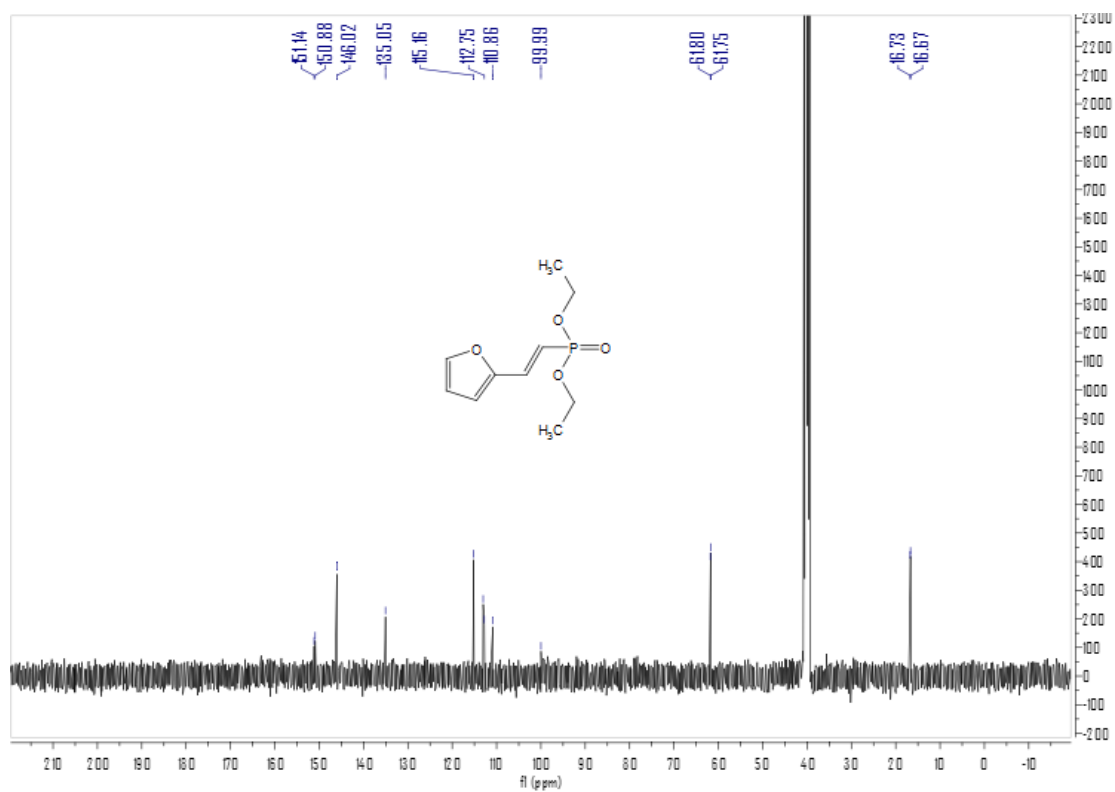

3q

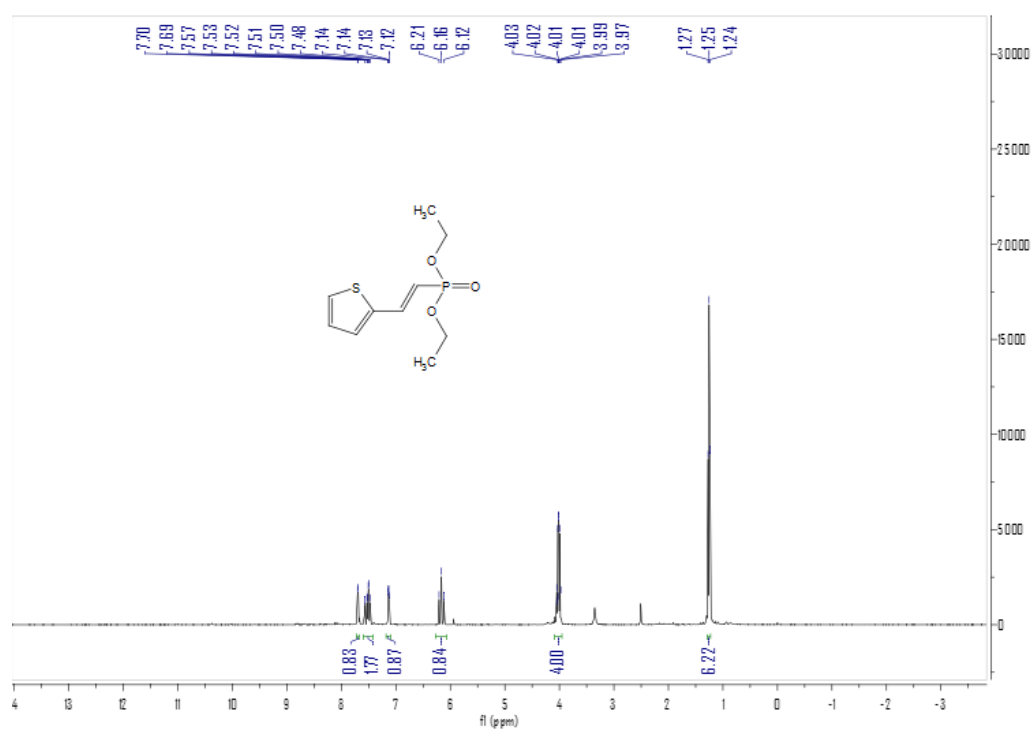

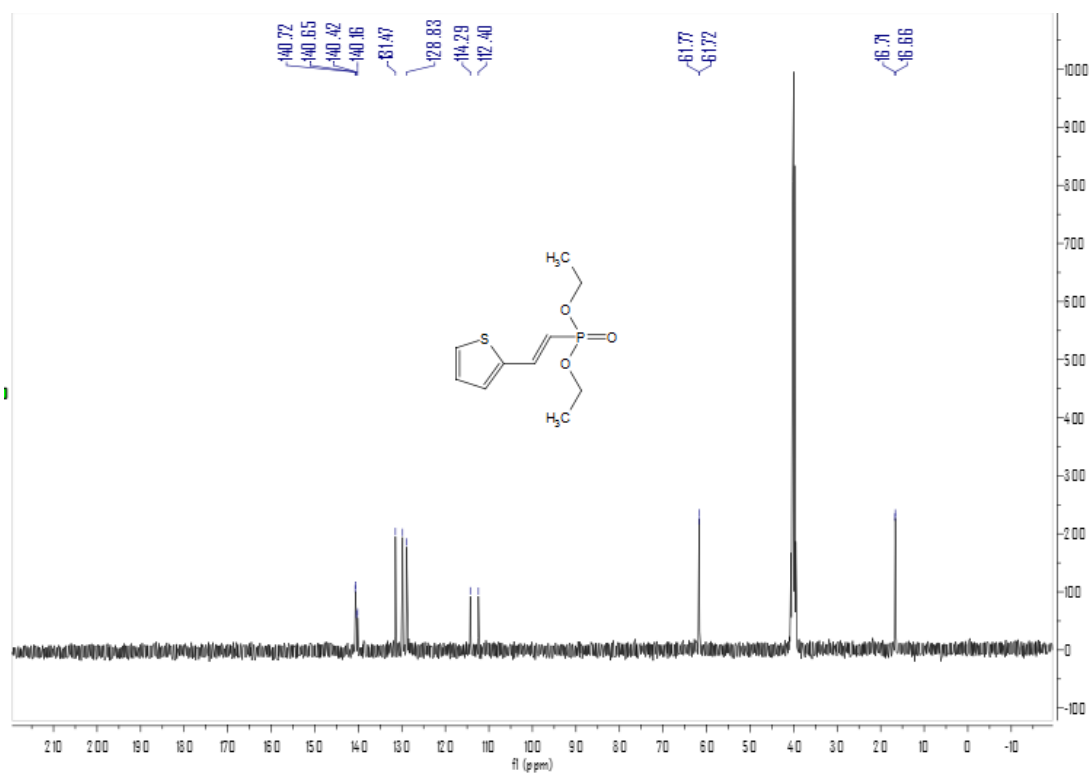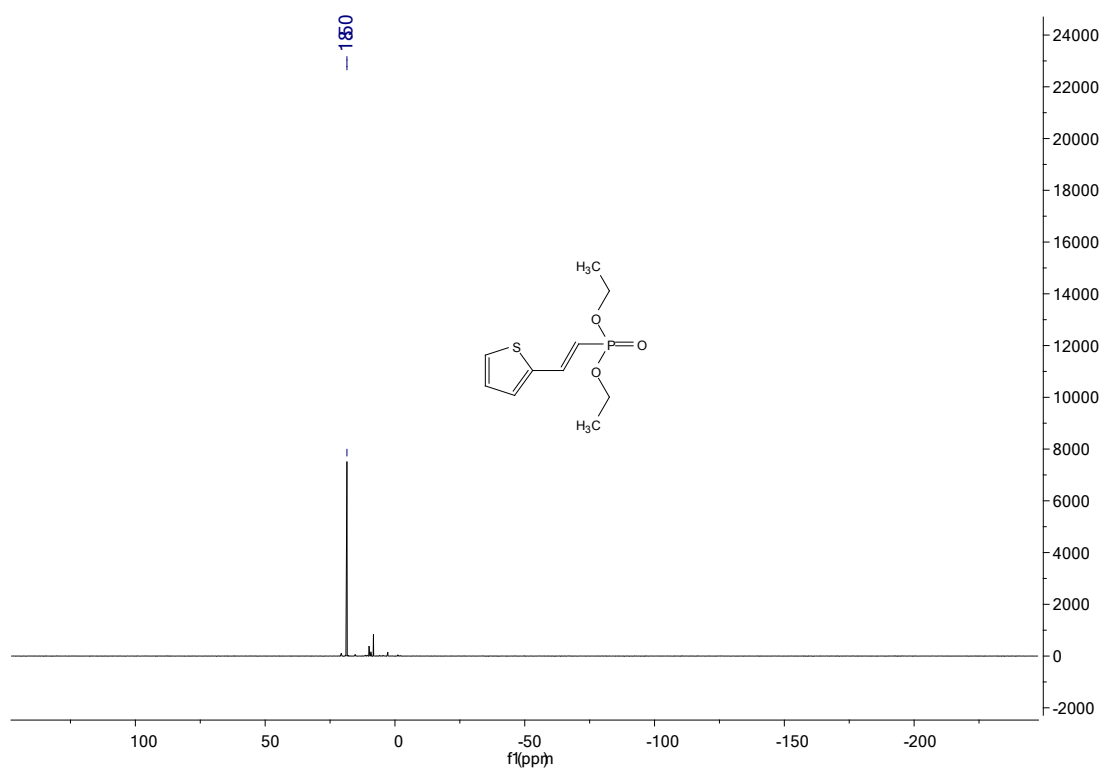

3r



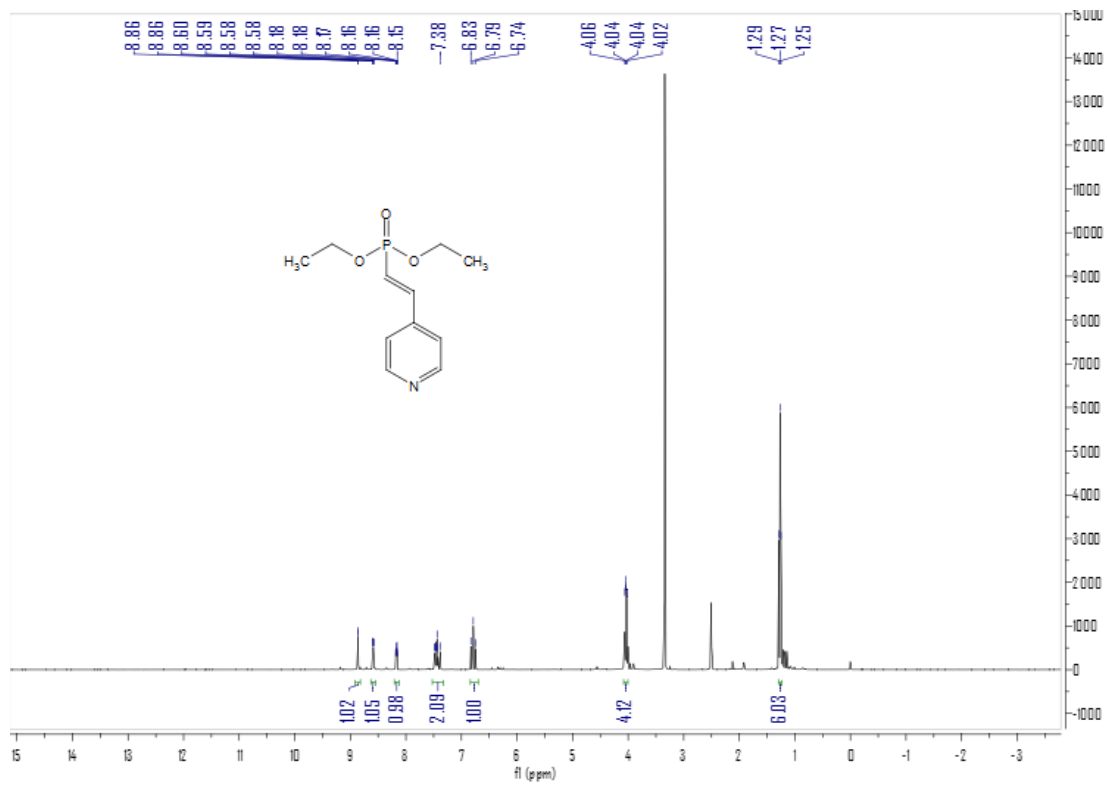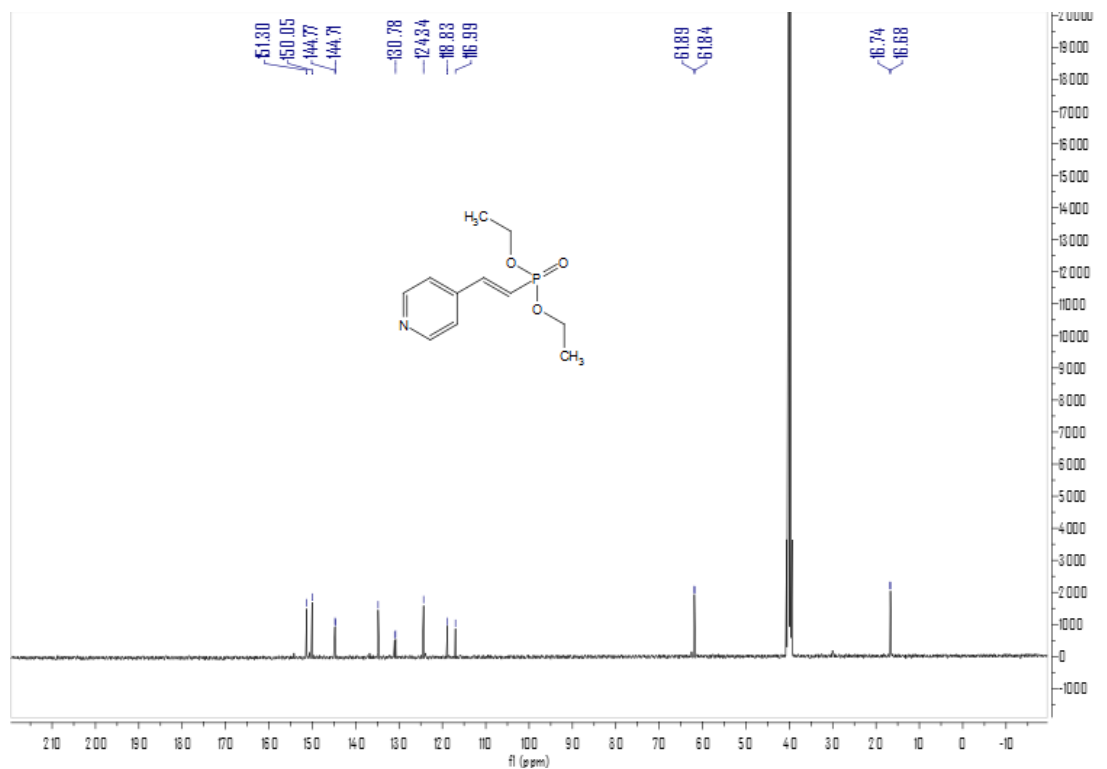

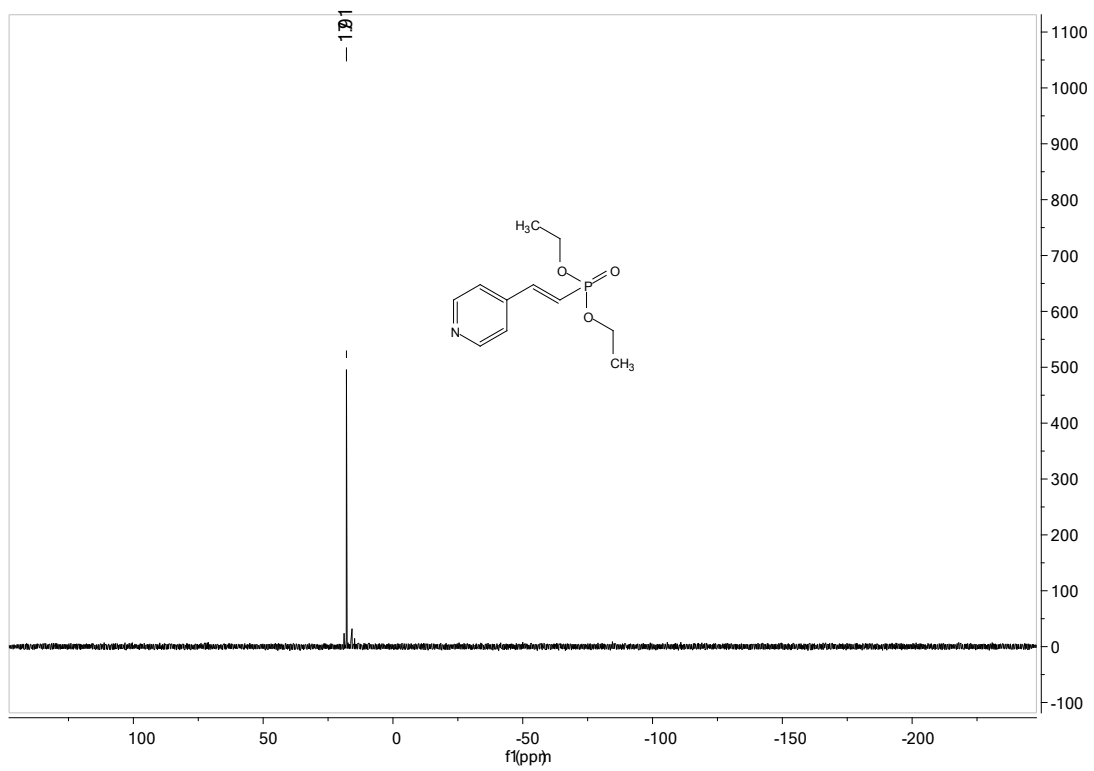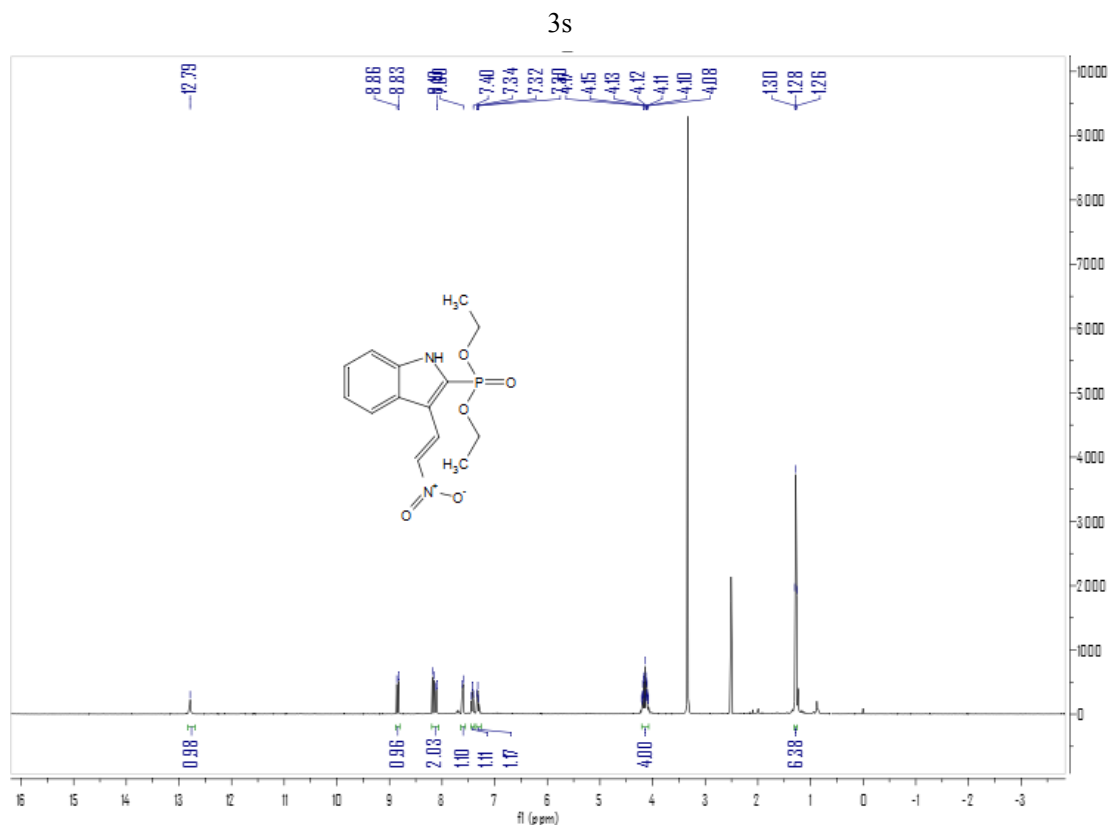

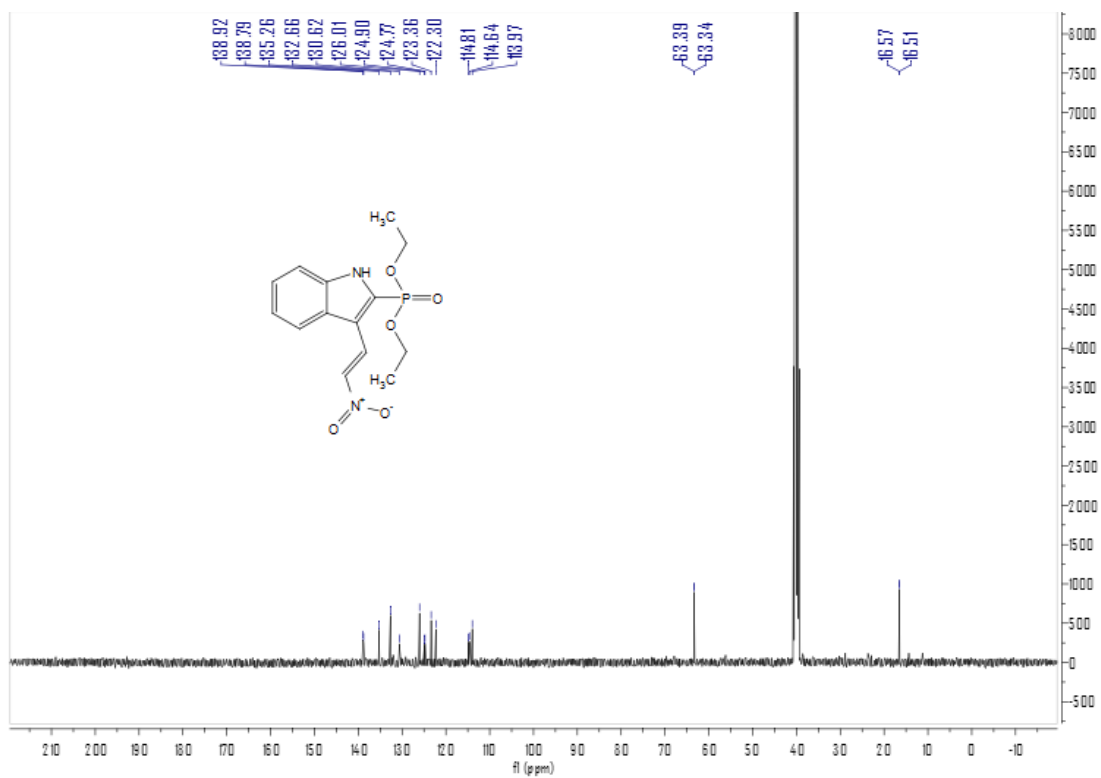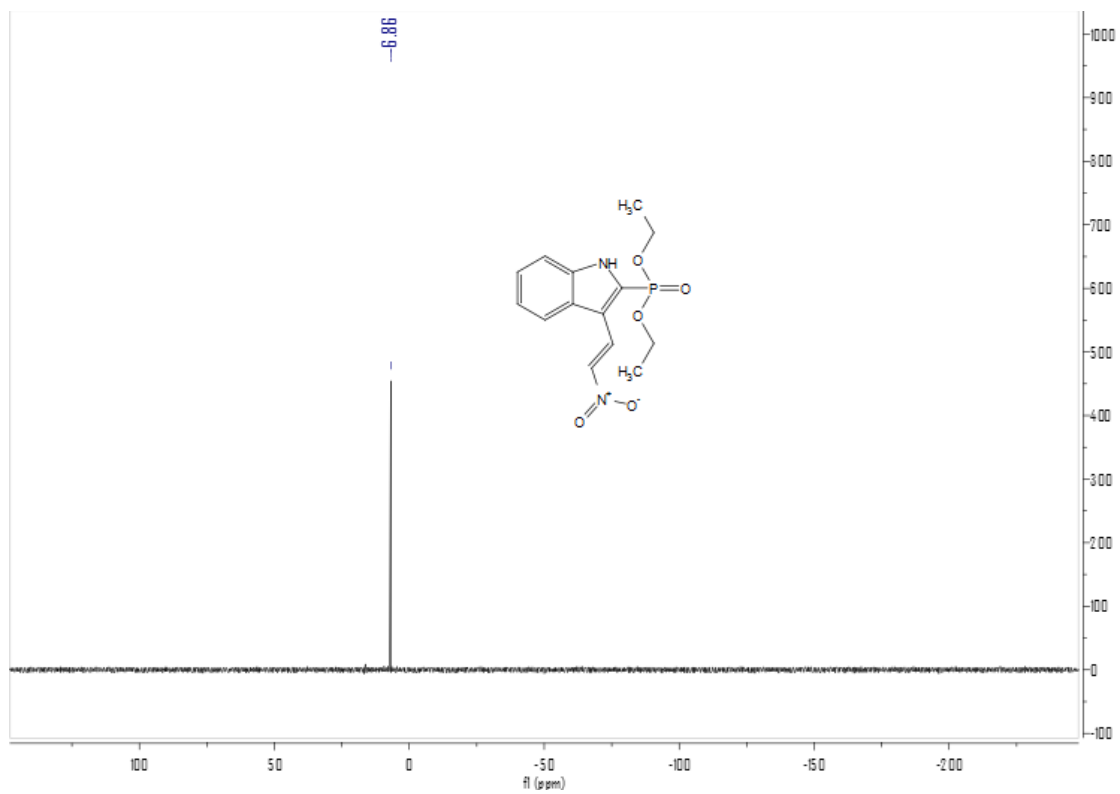

3t

S27

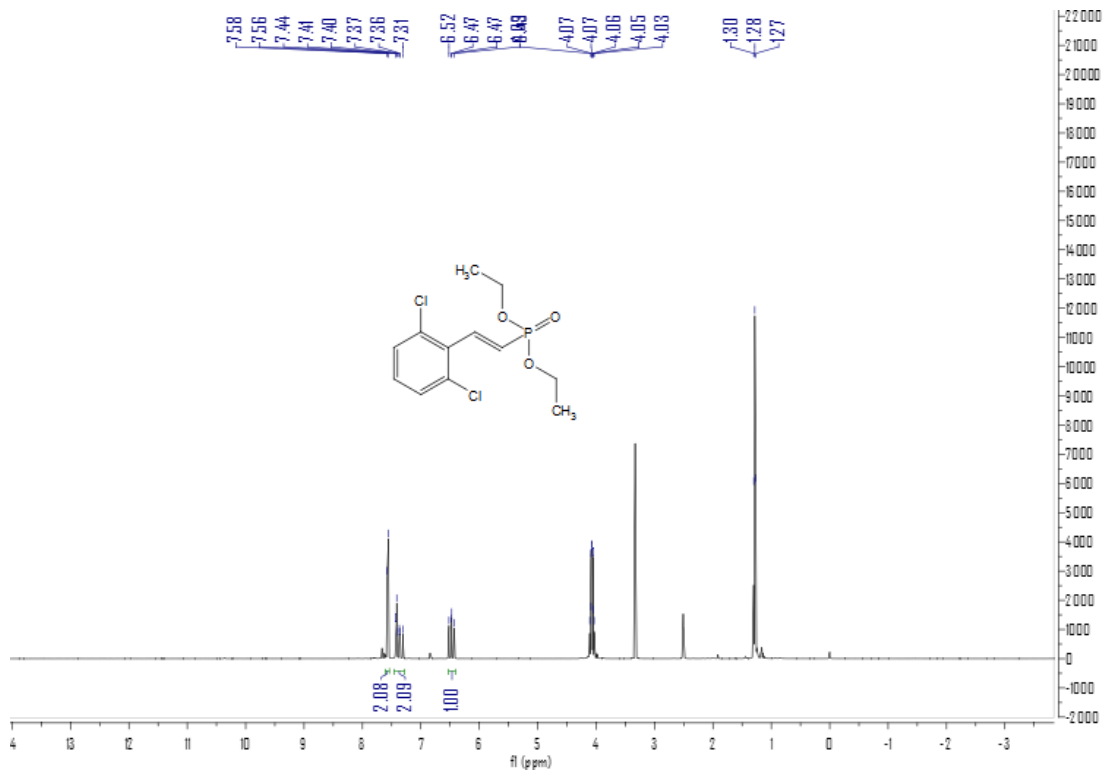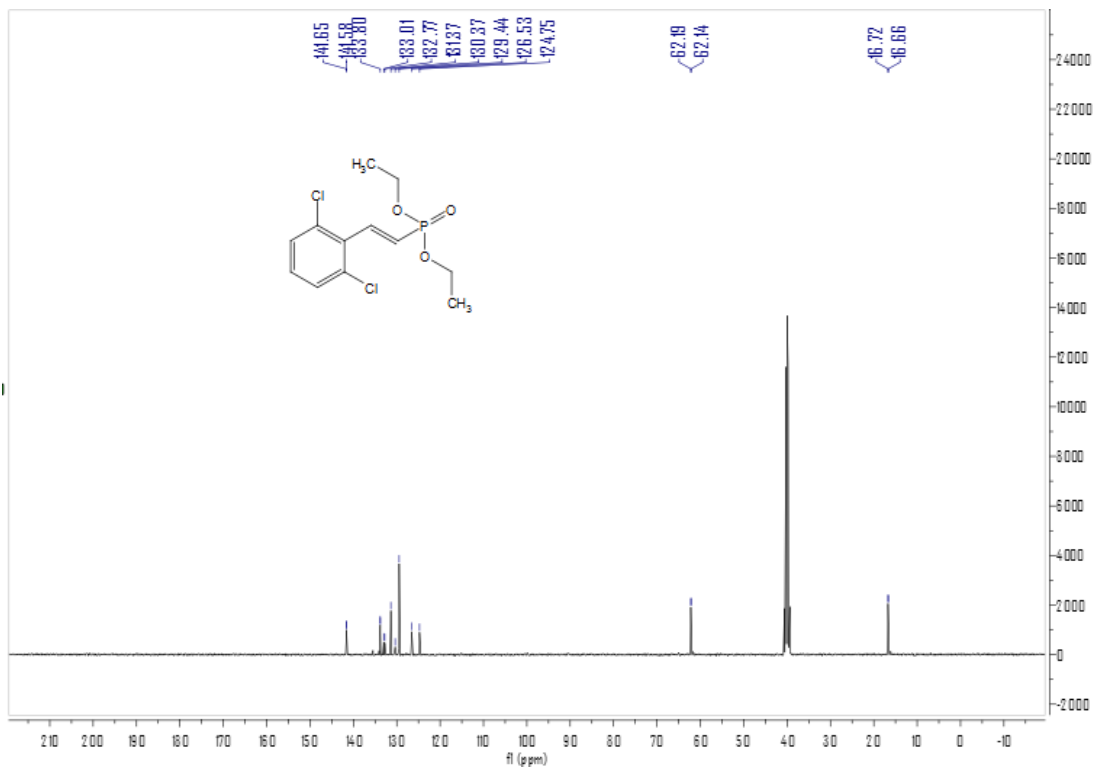

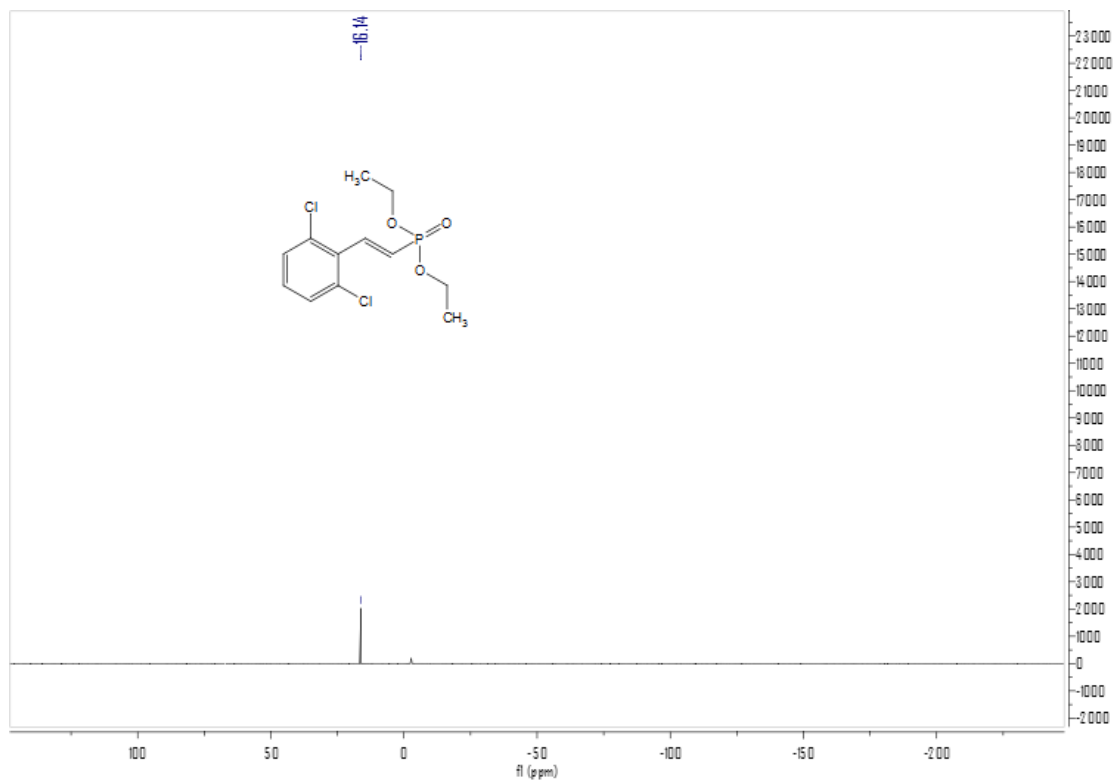

3u

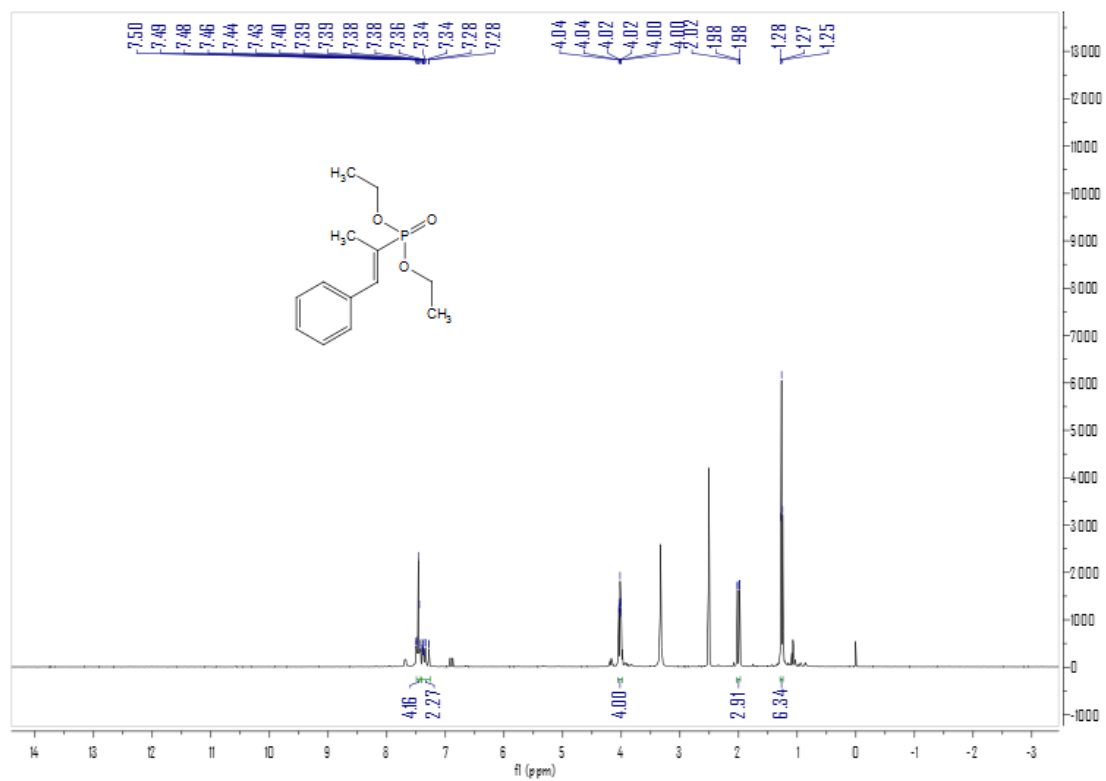

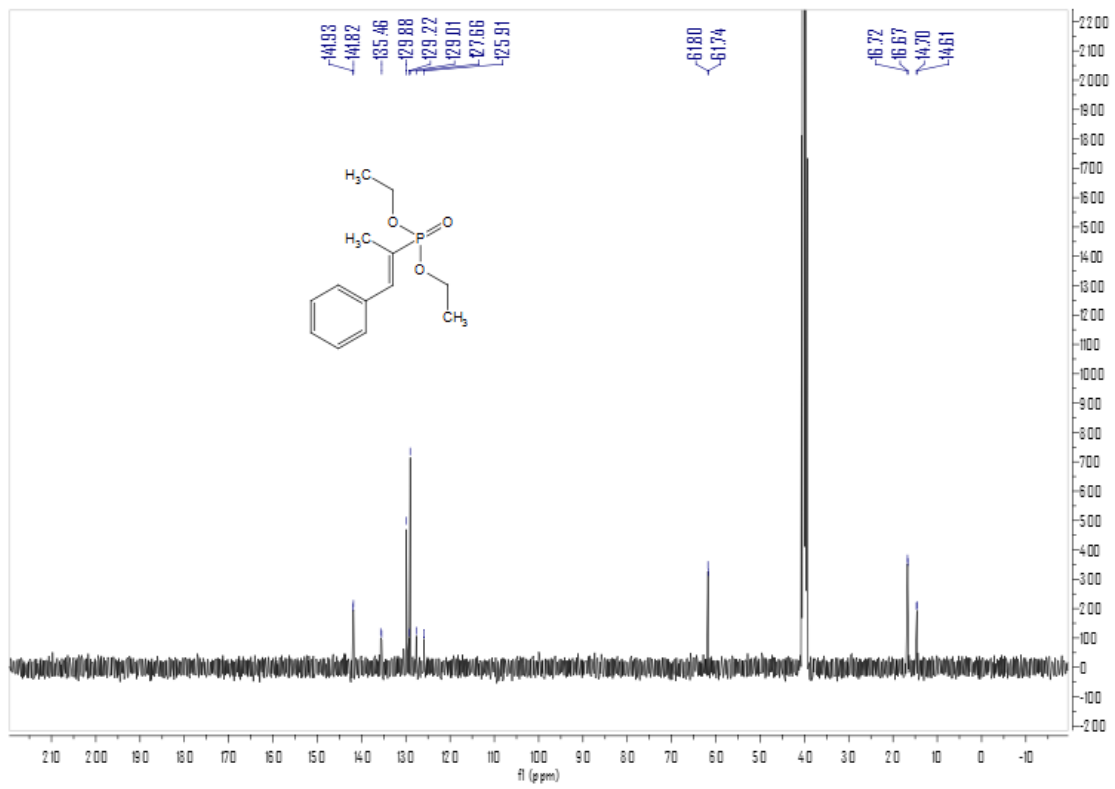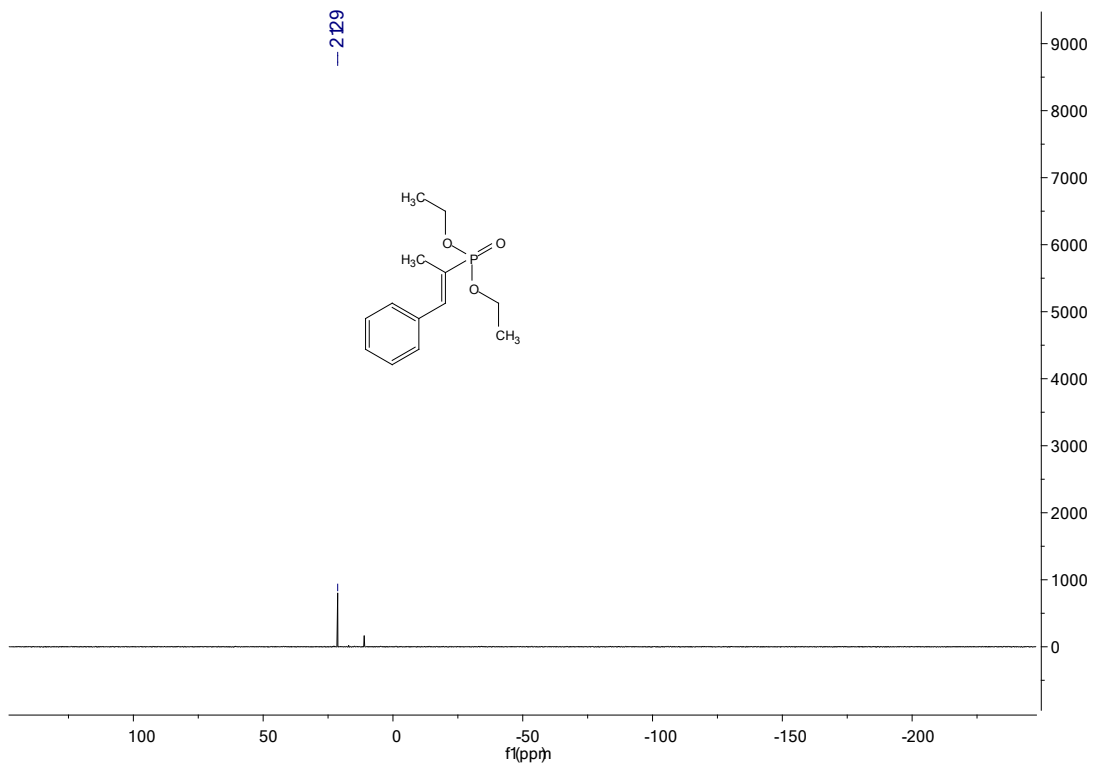

Supplement: c5ob00404g1.pdf [file c5ob00404g1.pdf]
